# Supplementary material for: Micronutrient supplementation affects transcriptional and epigenetic regulation of lipid metabolism in a dose-dependent manner
Source: PubMed Central journal article supplement — Epigenetics. 2020 Dec 31;16(11):1217–34. doi: 10.1080/15592294.2020.1859867 (PMC8813078; doi:10.1080/15592294.2020.1859867), 2020-12-31
Supplement: KEPI_A_1859867_SM8860.pdf [file KEPI_A_1859867_SM8860.pdf]

## **Micronutrient supplementation affects transcriptional and epigenetic regulations of lipid metabolism in a dose-dependent manner**

Takaya Saito, Paul Whatmore, John F. Taylor, Jorge M.O. Fernandes, Anne-Catrin Adam, Douglas R Tocher, Marit Espe, and Kaja H. Skjærven

### **Supplementary Methods**

#### **Experimental diets and feeding trial**

More comprehensive methods and materials regarding the feeding trial with experimental diets than the descriptions below are available<sup>1</sup> if needed.

#### **Experimental diets**

Feeds were formulated to reflect standard practice in commercial salmon feeds in terms of protein, oil and energy contents (Supplementary Table 2). Thus, feeds were initially formulated to contain 48% protein and 20% lipid (~22 MJ), with protein content decreasing and lipid content increasing with increasing pellet size to reach 36% protein and 34% lipid (~24 MJ) in the largest pellet size in seawater (Supplementary Table 3). The experimental feeds were a low FM (fish meal) / FO (fish oil) formulation (initially 15% and 8% in freshwater, decreasing to 5% and 3% respectively in seawater). Feeds were supplemented with a nutrient package (NP) at one of three inclusion levels to produce three dietary treatments: L1, 100% NP; L2, 200% NP; L3, 400% NP (Supplementary Table 1), the assumption being that the 100% NP package should contain 100 % of assumed requirement based on the given requirement levels reported for Atlantic salmon at the time<sup>2</sup> and modified according to earlier trials as part of the EU-funded ARRANA project<sup>3, 4</sup>. Specifically, the NP contained 24 nutrients in total these being; vitamins (A, D3, E, K3, C, thiamine, riboflavin, B6, B12, niacin, pantothenic acid, folic acid and biotin), minerals (Ca, Co, I, Se, Fe, Mn, Cu and Zn), crystalline amino acids (L-histidine and taurine) and cholesterol. Total and available phosphorus were fixed in all diets at 12.0 g/kg and 9.0 g/kg respectively, and magnesium at 1.5 g/kg, and were not part of the NP. Pellet size was adjusted according to fish weight (2mm, 3.5mm, 5mm, 7mm, 9mm). All non-oil ingredients were mixed, and pellets produced by extrusion to produce three base pellets that had oil added by vacuum coating. All feeds were produced at the BioMar Tech-Centre (Brande, Denmark).

#### **Micronutrient analysis of experimental diets**

Biotin (B7), niacin (B3), folate (B9), pantothenic acid (B5) and cobalamin (B12) were all determined by microbiological methods<sup>5,6</sup>. Thiamine (prEN 14122, CEN, 2003), vitamin B6 (prEN 14164, CEN, 2006) and riboflavin<sup>7</sup> as well as vitamins C<sup>8</sup>, E, K (prEN 12822, CEN, 1999), D and, A<sup>9</sup> were

determined by high-performance liquid chromatography (HPLC). Multi-element determination of minerals was done by inductively coupled plasma mass spectrometry (ICP-MS).

### **Feeding trial**

The freshwater phase was carried out at the Niall Bromage Freshwater Research Facility (Stirlingshire, UK). Initially, 500 diploid salmon parr (initial mean weight,  $38.2 \pm 5.8$  g) were stocked (September 4th, 2014) into nine x 1.6 m<sup>3</sup> circular fibreglass tanks (three tanks/diet). Fish were acclimatised to the experimental conditions for two weeks before being fed the experimental diets. Fish were fed continuously during the light period of the light dark cycle by automatic feeders (Arvotec T2000, Arvotec, Finland) controlled by a PC system. Specific feeding rates (SFR; % tank biomass per day) were adjusted automatically according to predicted growth and daily temperature. An out-of-season photoperiod (LL – 4 weeks LD14:10 – 4 weeks LL) and ambient water temperature (12 - 16 °C) was applied to produce S0+ smolts, with lighting provided by two 28 W fluorescent daylight bulbs (4000 °K, RS Components, UK) mounted centrally within the tank lid. Water was supplied by an upstream reservoir under flow-through conditions (10 L/min). Oxygen levels were always higher than 8 mg/L. Uneaten feed recovery was not feasible during the freshwater phase.

Post-smolts were transferred (November 4th, 2014) to the Marine Harvest (Mowi) Feed Trial Unit, (Ardnish, Scotland) and on-grown for 12 months in 5 x 5 x 5 m sea pens under natural photoperiod and ambient water temperatures ranging from 6 to 16 °C. Triplicate groups of 250 post-smolts from respective tanks were stocked per pen and on-grown to a final size of ~3.0 kg. Fish were fed continuously during daylight by automatic feeders (Arvotec T2000) controlled by a PC system. Specific feeding rates (SFR; % pen biomass per day) were adjusted weekly according to predicted growth and water temperature. Waste feed was collected per pen by means of air uplifts following meal delivery ensuring satiation and allowing calculation of total daily feed intake (Fi).

### **DNA and RNA extraction**

At the end of the feeding trial, liver tissue for both RNA and DNA extraction were dissected from 6 fish per diet at the same area of each individual, the ventral posterior lobe, and snap frozen in liquid nitrogen and stored at -80°C until further processing. DNA and RNA were extracted from same fish. For each feed group, liver samples were selected from the triplicate feeding tanks for RNA sequencing and RRBS. For both RNA and DNA extraction, tissue samples were homogenized using ceramic beads CK28 and a Precellys 24 homogenizer (Bertin Technologies).

RNA was extracted using the BioRobot EZ1 and EZ1 RNA Universal Tissue kit (Qiagen) and DNase treated with Ambion DNA-free DNA removal kit (Invitrogen, USA) according to the protocols. RNA quantity, which was  $2460 \pm 652$  ng/ml on average, were assessed using NanoDrop

ND-1000 Spectrophotometer (Nanodrop Technologies). RNA integrity (RIN), which was  $9.55 \pm 0.15$  on average, were analysed using an Agilent 2100 Bioanalyser (RNA 6000 Nano LabChip kit, Agilent Technologies).

Homogenate from six single male livers from each feed group were resuspended in lysis buffer and DNA isolation was performed using the DNeasy Blood & Tissue Kit (Qiagen, Cat. No. #69506) according to the manufacturer's protocol, except that after homogenization, tissue for DNA extraction were pre-treated with RNase A (provided by the Qiagen kit, 50ng/ $\mu$ L, 10 min at room temperature) immediately followed by proteinase K treatment (New England Biolabs, #8102S 20 $\mu$ g/ $\mu$ L, 1.5 h at 55°C). DNA was eluted in Milli Q H<sub>2</sub>O. Quantification of double stranded genomic DNA was done using the Qubit High Sensitivity Assay (Life Technologies #Q32854).

### **RRBS library preparation and sequencing**

For RRBS, 100 ng of genomic DNA were digested for 6h at 65°C with 20 U TaqI (New England Biolabs) and 6h hours at 37°C with 20 U of MspI (New England Biolabs) in 30  $\mu$ l of 1x NEB buffer 2. To retain even the smallest fragments and to minimize the loss of material, end preparation and adaptor ligation were performed in a single-tube setup. End fill-in and A-tailing were performed by addition of Klenow Fragment 3' -> 5' exo- (New England Biolabs) and dNTP mix (10 mM dATP, 1 mM dCTP, 1 mM dGTP). After ligation to methylated Illumina TruSeq LT v2 adaptors using T4 DNA Ligase rapid (Enzymatics), the libraries were size selected by performing a 0.75x clean-up with AMPure XP beads (Beckman Coulter).

The libraries were pooled based on qPCR data and subjected to bisulfite conversion using the EZ DNA Methylation Direct Kit (Zymo Research) with changes to the manufacturer's protocol: conversion reagent was used at 0.9x concentration, incubation performed for 20 cycles of 1 min at 95°C, 10 min at 60°C and the desulphonation time was extended to 30 min. These changes increase the number of CpG dinucleotides covered, by reducing double-strand break formation in larger library fragments. Bisulfite-converted libraries were enriched KAPA HiFi HS Uracil+ RM (Roche). The minimum number of enrichment cycles was estimated based on a qPCR experiment. After a 1x AMPure XP clean-up, library concentrations were quantified with the Qubit Fluorometric Quantitation system (Life Technologies) and the size distribution was assessed using the Bioanalyzer High Sensitivity DNA Kit (Agilent).

RRBS libraries were sequenced on Illumina HiSeq 3000/4000 instruments in 50-base-pair-single-end mode or 60-base-pair-single-end mode, and base calls provided by the Illumina Real-Time Analysis (RTA) software were subsequently converted into BAM format (Illumina2bam) before demultiplexing (BamIndexDecoder) into individual, sample-specific BAM files via Illumina2bam tools (1.17.3 <https://github.com/wtsi-npg/illumina2bam>).

### **Wilcoxon signed-rank test (Wilcox) to find enriched KEGG pathways by comparing methylation rates of CpG sites between two diet groups**

Instead of using DMGs as for ORA, we directly used methylation rates at the mapped CpG sites with the Wilcoxon signed-rank test, which is a non-parametric version of paired test, to identify enriched KEGG pathways. We first linked a KEGG pathway with CpG sites through the genes where the mapped CpG sites reside, followed by the Wilcoxon signed-rank test to compare two samples of methylation rates in a pair-wised manner. The pathways associated less than 20 CpG sites were ignored. We defined enriched pathways when they had adjusted p-values  $< 0.05$  after applying the Benjamini-Hochberg procedure. Moreover, we performed this procedure on several different regions, such as intron, exon, P250, and so on.

For example, 1074 CpG sites were associated with mTOR signalling pathway (sasa04150) for L1 and L3 in introns. The medians of methylation rates were 96.1% and 95.5% for L1 and L3, respectively. To find whether two samples were from the same distribution, the Wilcoxon signed-rank test was used to calculate a p-value by comparing all the 1074 methylation rates between L1 and L3. This pathway was identified as enriched in introns since its adjusted p-value was  $< 0.05$ .

### **Bootstrap Kolmogorov-Smirnov test (KS-boot) to find enriched KEGG pathways by comparing methylation differences against the background distribution of a region**

We also compared methylation differences that belong to a specific KEGG pathway against the whole background methylation differences by using the Kolmogorov-Smirnov test. The p-value of the Kolmogorov-Smirnov test is known to be inaccurate when there are ties. We used a bootstrap version of the test (with 1000 bootstraps) to avoid the difficulties with ties since there were many CpG site with no methylation differences, whose values were simply 0%. We defined enriched pathways when they had adjusted p-values  $< 0.01$  after applying the Benjamini-Hochberg procedure. We performed the same procedure on different regions.

For example, 1074 CpG sites were associated with mTOR signalling pathway (sasa04150) for L3:L1 in introns, whereas 110 395 CpG sites were identified in the whole introns. The medians of methylation differences were -0.18% for L3:L1 and 0% for the whole introns. To find whether the methylation differences of L3:L1 in introns were independent from the distribution of the methylation differences in the whole introns, the Bootstrap Kolmogorov-Smirnov test was used to calculate a p-value by comparing 1074 methylation differences of L3:L1 against 110 395 methylation differences. This pathway was identified as enriched since its adjusted p-value was  $< 0.01$ .

### **Combine ORA, Wilcox, and KS-boot to summarise enriched KEGG pathways**

We made the final list of enriched KEGG pathways by combining all the results from the three methods as ORA OR (Wilcox AND KS-boos). The enriched functions identified by ORA were always considered, whereas only intersections of the pathways found in both Wilcox AND KS-boos were considered. The final list of the pathways was formed by the union of ORA and the intersection of Wilcox and KS-boos.

## Supplementary tables

**Supplementary Table 1.** Added micronutrient concentrations (mg/kg) within the NP.

| <b>Nutrient group</b> | <b>Micronutrient</b>  | <b>L1</b>   | <b>L2</b> | <b>L3</b> |
|-----------------------|-----------------------|-------------|-----------|-----------|
| <b>Vitamin</b>        | Vitamin A             | 3.79        | 7.58      | 15.16     |
|                       | Vitamin D3            | 0.05        | 0.1       | 0.2       |
|                       | Vitamin E             | 102.4       | 204.9     | 409.8     |
|                       | Vitamin K3            | 9.82        | 19.64     | 39.28     |
|                       | Thiamine (B1)         | 2.67        | 5.34      | 10.68     |
|                       | Riboflavin (B2)       | 8.3         | 16.6      | 33.2      |
|                       | B6                    | 4.77        | 9.54      | 19.08     |
|                       | B12                   | 0.25        | 0.5       | 1         |
|                       | Niacin (B3)           | 24.8        | 49.6      | 99.2      |
|                       | Pantothenic Acid (B5) | 17.15       | 34.3      | 68.6      |
|                       | Folic Acid (B9)       | 2.82        | 5.64      | 11.28     |
|                       | Biotin (B7)           | 0.14        | 0.28      | 0.56      |
|                       | Vitamin C             | 80          | 160       | 320       |
|                       | <b>Micro-mineral</b>  | Cobalt (Co) | 0.94      | 1.88      |
| Iodine                |                       | 0.67        | 1.34      | 2.68      |
| Selenium              |                       | 0.23        | 0.46      | 0.92      |
| Iron                  |                       | 32.64       | 65.28     | 130.6     |
| Manganese             |                       | 12.03       | 24.06     | 48.12     |
| Copper                |                       | 3.24        | 6.48      | 12.96     |
| Zinc                  |                       | 66.92       | 133.8     | 267.7     |
| <b>Macro-mineral</b>  | Calcium (Ca)          | 0.4         | 0.8       | 1.6       |
| <b>Amino acid</b>     | Taurine               | 2450        | 4900      | 9800      |
|                       | Histidine             | 1400        | 2800      | 5600      |
| <b>Cholesterol</b>    | Cholesterol           | 1100        | 2200      | 4400      |

**Supplementary Table 2.** Ingredients and formulation (g/100g) of the experimental diets.

| Ingredients                                            | Marine pellet size <sup>1</sup> |                           |                           |
|--------------------------------------------------------|---------------------------------|---------------------------|---------------------------|
|                                                        | 3.5 mm                          | 5.0 / 7.0 mm              | 9.0 mm                    |
| Fish Meal <sup>2</sup>                                 | 13.00                           | 8.00                      | 3.00                      |
| Krill Meal <sup>3</sup>                                | 2.00                            | 2.00                      | 2.00                      |
| Soy Protein Concentrate <sup>4</sup>                   | 15.58                           | 15.40                     | 12.58                     |
| Wheat Gluten <sup>5</sup>                              | 12.46                           | 13.09                     | 10.70                     |
| Maize Gluten                                           | 3.12                            | 3.08                      | 2.52                      |
| Pea Protein Concentrate <sup>6</sup>                   | 12.46                           | 13.09                     | 10.70                     |
| Wheat <sup>7</sup>                                     | 17.86                           | 10.00                     | 13.33                     |
| Sunflower Expeller                                     | -                               | 6.32                      | 6.77                      |
| Fish Oil <sup>8</sup>                                  | 5.00                            | 4.00                      | 3.00                      |
| Rapeseed oil <sup>5</sup>                              | 7.65                            | 10.61                     | 16.17                     |
| Linseed oil                                            | 1.91                            | 2.55                      | 3.84                      |
| Palm kernel oil                                        | 4.78                            | 6.38                      | 9.61                      |
| ARRAINA Nutrient Package <sup>9,†</sup> (L1 / L2 / L3) | <b>0.75 / 1.50 / 3.00</b>       | <b>0.75 / 1.50 / 3.00</b> | <b>0.75 / 1.50 / 3.00</b> |
| Monosodium Phosphate                                   | 2.03                            | -                         | -                         |
| Monocalcium phosphate                                  | -                               | 2.05                      | 1.46                      |
| Amino acid Premix <sup>10,*</sup> (L1 / L2 / L3)       | 2.14 / 2.34 / 2.32              | 2.07 / 2.11 / 2.16        | 2.15 / 2.18 / 2.24        |
| Yttrium                                                | 0.05                            | 0.05                      | 0.05                      |
| Lucantin Pink                                          | 0.06                            | 0.06                      | 0.06                      |
| Water change                                           | -1.98                           | -0.52                     | 0.28                      |

<sup>1</sup>Feed Services, Bremen, Germany; <sup>2</sup>Aker Biomarine, Norway; <sup>3</sup>Caramuru, Brazil; <sup>4</sup>Cargill, Germany; <sup>5</sup>Agrident, Germany; <sup>6</sup>WN Lindsey, UK; <sup>7</sup>ED & F Man, Germany; <sup>8</sup>DSM, Netherlands; <sup>9</sup>Evonik, Germany; <sup>†</sup>Added as components of the nutrient package (NP), and times requirement based on NRC (2011) minimum requirement for Atlantic salmon and modified according to Hemre et al., (2016), diet L1 achieving assumed 100 % minimum requirement; <sup>\*</sup>Balanced for lysine, methionine, threonine and valine. Contains antioxidant.

**Supplementary Table 3.** Alternations of pellet sizes with different FM and FO inclusions

| <b>Pellet size</b>  | <b>Stage</b> | <b>Fish size</b> | <b>Fish meal (FM)</b> | <b>Fish oil (FO)</b> | <b>Total FM and FO</b> |
|---------------------|--------------|------------------|-----------------------|----------------------|------------------------|
| <b>2.0 mm</b>       | Fresh water  | 20-60 g          | 15%                   | 8%                   | 23%                    |
| <b>3.5 mm</b>       | Salt water   | 75-250 g         | 15%                   | 5%                   | 20%                    |
| <b>5.0 / 7.0 mm</b> | Salt water   | 250-1000 g       | 10%                   | 4%                   | 14%                    |
| <b>9.0 mm</b>       | Salt water   | 1000-2500 g      | 5%                    | 3%                   | 8%                     |



**Supplementary Table 4.** Analysed concentrations of the experimental diets.

| Nutrient group       | Unit  | Micronutrient         | Graded level <sup>†</sup> | L1    | L2   | L3    | NRC 2011 <sup>‡</sup> |
|----------------------|-------|-----------------------|---------------------------|-------|------|-------|-----------------------|
| <b>Vitamin</b>       | mg/kg | Vitamin A             | Yes                       | 3.73  | 5.15 | 12.16 | 0.75 <sup>a</sup>     |
|                      |       | Vitamin D3            | Yes                       | 0.15  | 0.19 | 0.19  | 0.04 <sup>a</sup>     |
|                      |       | Vitamin E             | Yes                       | 241.5 | 364  | 436.5 | 60 <sup>b</sup>       |
|                      |       | Vitamin K3            | Yes                       | 0.71  | 1.51 | 2.7   | <10 <sup>b</sup>      |
|                      |       | Thiamin (B1)          | Yes                       | 4.5   | 7.1  | 8.8   | 1 <sup>a</sup>        |
|                      |       | Riboflavin (B2)       | Yes                       | 17.2  | 27.8 | 33.5  | 4 <sup>a</sup>        |
|                      |       | Vitamin B6            | Yes                       | 12.8  | 16.8 | 21.3  | 5 <sup>b</sup>        |
|                      |       | Vitamin B12           | Yes                       | 0.18  | 0.35 | 0.67  | NT                    |
|                      |       | Niacin (B3)           | Yes                       | 73    | 112  | 148   | 10 <sup>a</sup>       |
|                      |       | Pantothenic acid (B5) | Yes                       | 24    | 58   | 44    | 20 <sup>a</sup>       |
|                      |       | Folic acid (B9)       | Yes                       | 6.53  | 9.69 | 11.67 | 1 <sup>a</sup>        |
|                      |       | Biotin (B7)           | Yes                       | 0.51  | 0.72 | 0.74  | 0.15 <sup>a</sup>     |
|                      |       | Vitamin C             | Yes                       | 183   | 251  | 409   | 20 <sup>b</sup>       |
| <b>Micro-mineral</b> | mg/kg | Cobalt                | Yes                       | 0.18  | 0.22 | 0.32  | NT                    |
|                      |       | Iodine                | Yes                       | n.a   | n.a  | n.a   | 1.1 <sup>a</sup>      |
|                      |       | Selenium              | Yes                       | 1.13  | 1.48 | 1.65  | 0.15 <sup>a</sup>     |
|                      |       | Iron                  | Yes                       | 330   | 358  | 403   | 30-60 <sup>b</sup>    |
|                      |       | Manganese             | Yes                       | 42    | 53   | 86    | 10 <sup>b</sup>       |
|                      |       | Copper                | Yes                       | 11.8  | 14.8 | 22.8  | 5 <sup>b</sup>        |
|                      |       | Zinc                  | Yes                       | 94    | 156  | 330   | 37 <sup>b</sup>       |
| <b>Macro-mineral</b> | g/kg  | Calcium               | Yes                       | 6.7   | 7.1  | 8.2   | NR <sup>*b</sup>      |
|                      |       | Magnesium             | No                        | 1.73  | 1.66 | 1.68  | 0.4 <sup>b</sup>      |
|                      |       | Phosphorus            | No                        | 12.7  | 12.5 | 12.5  | 8.0 <sup>b</sup>      |
| <b>Amino acid</b>    | g/kg  | Taurine               | Yes                       | 2.6   | 4.4  | 10.1  | NR <sup>b</sup>       |
|                      |       | Methionine            | No                        | 9.7   | 9.9  | 10.3  | 7.0 <sup>b</sup>      |
|                      |       | Histidine             | Yes                       | 11.4  | 13.1 | 17.1  | 8.0 <sup>b</sup>      |
| <b>Cholesterol</b>   |       | Cholesterol           | Yes                       | n.a   | n.a  | n.a   | NR                    |

<sup>†</sup>Nutrients added at graded levels to the feeds. <sup>‡</sup>Current NRC, 2011, minimum requirement recommendations determined in <sup>a</sup>rainbow trout and <sup>b</sup>Atlantic salmon. Non-numeric values represent; n.a (not analysed), NR (no requirement), NR\* (no requirement freshwater), and NT (not tested).

**Supplementary Table 5.** Growth measures (mean  $\pm$  SEM) recorded at the smolt and final stages.

| Stage        | Measurement               | Unit              | L1                           | L2                            | L3                           |
|--------------|---------------------------|-------------------|------------------------------|-------------------------------|------------------------------|
| <b>Smolt</b> | Body weight               | g                 | 68.0 $\pm$ 0.5 <sup>c</sup>  | 77.4 $\pm$ 0.5 <sup>a</sup>   | 73.8 $\pm$ 0.8 <sup>b</sup>  |
|              | Condition Factor (K)      | g/cm <sup>3</sup> | 1.21 $\pm$ 0.00              | 1.19 $\pm$ 0.00               | 1.19 $\pm$ 0.00              |
|              | Hepatosomatic index (HIS) | %                 | 1.28 $\pm$ 0.06 <sup>a</sup> | 1.04 $\pm$ 0.01 <sup>b</sup>  | 1.15 $\pm$ 0.06 <sup>b</sup> |
|              | Mortality                 | %                 | 0.2 $\pm$ 0.2                | 0.3 $\pm$ 0.1                 | 0.0 $\pm$ 0.0                |
| <b>Final</b> | Body weight               | g                 | 2127 $\pm$ 59 <sup>b</sup>   | 2381 $\pm$ 82 <sup>a</sup>    | 2385 $\pm$ 37 <sup>a</sup>   |
|              | Condition Factor (K)      | g/cm <sup>3</sup> | 1.37 $\pm$ 0.01 <sup>b</sup> | 1.43 $\pm$ 0.02 <sup>ab</sup> | 1.46 $\pm$ 0.03 <sup>a</sup> |
|              | Hepatosomatic index (HIS) | %                 | 1.08 $\pm$ 0.06              | 1.02 $\pm$ 0.01               | 1.10 $\pm$ 0.04              |
|              | Mortality                 | %                 | 0.95 $\pm$ 0.76              | 2.64 $\pm$ 2.25               | 0.54 $\pm$ 0.13              |

<sup>a,b,c</sup>Superscripts denote significant differences between diets ( $p < 0.05$ , one-way ANOVA).

**Supplementary Table 6.** Read alignment of 18 RNA-seq samples on the Salmon genome.

| No | Name | Diet | Sex | Total reads | Uniquely mapped | (%)    | Multi-mapped | (%)    | Non-mapped | (%)   |
|----|------|------|-----|-------------|-----------------|--------|--------------|--------|------------|-------|
| 1  | L1   | L2   | M   | 23 930 797  | 19 047 920      | (79.6) | 3 773 848    | (15.8) | 1 109 029  | (4.6) |
| 2  | L6   | L3   | M   | 25 782 928  | 20 489 194      | (79.5) | 3 988 812    | (15.5) | 1 304 922  | (5.1) |
| 3  | L9   | L3   | M   | 24 514 536  | 18 671 845      | (76.2) | 4 725 509    | (19.3) | 1 117 182  | (4.6) |
| 4  | L11  | L1   | M   | 35 224 641  | 28 126 452      | (79.9) | 5 379 803    | (15.3) | 1 718 386  | (4.9) |
| 5  | L18  | L2   | M   | 26 963 177  | 21 310 739      | (79.0) | 4 436 696    | (16.5) | 1 215 742  | (4.5) |
| 6  | L21  | L1   | M   | 18 941 648  | 15 002 865      | (79.2) | 2 951 549    | (15.6) | 987 234    | (5.2) |
| 7  | L22  | L1   | M   | 23 088 225  | 18 320 836      | (79.4) | 3 680 166    | (15.9) | 1 087 223  | (4.7) |
| 8  | L23  | L1   | M   | 25 797 353  | 20 597 043      | (79.8) | 3 946 915    | (15.3) | 1 253 395  | (4.9) |
| 9  | L24  | L1   | M   | 24 137 905  | 18 864 956      | (78.2) | 4 142 372    | (17.2) | 1 130 577  | (4.7) |
| 10 | L26  | L3   | M   | 22 122 866  | 17 141 205      | (77.5) | 3 815 675    | (17.3) | 1 165 986  | (5.3) |
| 11 | L27  | L3   | M   | 23 379 331  | 18 435 658      | (78.9) | 3 806 566    | (16.3) | 1 137 107  | (4.9) |
| 12 | L31  | L2   | M   | 22 903 741  | 17 406 367      | (76.0) | 3 765 846    | (16.4) | 1 731 528  | (7.6) |
| 13 | L32  | L2   | M   | 24 847 074  | 19 675 370      | (79.2) | 3 952 409    | (15.9) | 1 219 295  | (4.9) |
| 14 | L34  | L2   | M   | 25 061 137  | 19 505 737      | (77.8) | 4 244 064    | (16.9) | 1 311 336  | (5.2) |
| 15 | L35  | L2   | M   | 26 768 289  | 20 824 641      | (77.8) | 3 715 678    | (13.9) | 2 227 970  | (8.3) |
| 16 | L36  | L3   | M   | 23 217 907  | 18 221 640      | (78.5) | 3 877 812    | (16.7) | 1 118 455  | (4.8) |
| 17 | L40  | L3   | M   | 26 143 116  | 20 707 682      | (79.2) | 4 103 148    | (15.7) | 1 332 286  | (5.1) |
| 18 | L41  | L1   | M   | 23 950 855  | 18 851 368      | (78.7) | 4 100 134    | (17.1) | 999 353    | (4.2) |

**Supplementary Table 7.** Common DEGs between L2:L1 and L3:L1.

| Gene symbol         | Gene ID   | Gene name                                                        | LFC L1L2 | LFC L1L3 | Graded |
|---------------------|-----------|------------------------------------------------------------------|----------|----------|--------|
| <b>LOC106605546</b> | 106605546 | squalene monooxygenase-like                                      | -3.5     | -5.1     | Yes    |
| <b>hmgcr</b>        | 106570829 | 3-hydroxy-3-methylglutaryl-CoA reductase                         | -2.6     | -4.5     | Yes    |
| <b>LOC106579093</b> | 106579093 | squalene monooxygenase-like                                      | -1.8     | -4.4     | Yes    |
| <b>LOC106601335</b> | 106601335 | solute carrier family 25 member 38-B-like                        | -1.8     | -3.0     | Yes    |
| <b>LOC106605924</b> | 106605924 | farnesyl pyrophosphate synthase-like                             | -1.8     | -2.1     | Yes    |
| <b>LOC106604248</b> | 106604248 | sterol-4-alpha-carboxylate 3-dehydrogenase, decarboxylating-like | -1.6     | -2.7     | Yes    |
| <b>lss</b>          | 106581851 | lanosterol synthase                                              | -1.5     | -3.5     | Yes    |
| <b>LOC106564571</b> | 106564571 | glutaryl-CoA dehydrogenase, mitochondrial-like                   | -1.3     | -2.0     | Yes    |
| <b>LOC106591920</b> | 106591920 | 3-beta-hydroxysteroid-Delta(8),Delta(7)-isomerase-like           | -1.1     | -2.8     | Yes    |
| <b>LOC106591002</b> | 106591002 | probable ergosterol biosynthetic protein 28                      | -1.0     | -1.4     | Yes    |
| <b>LOC106587139</b> | 106587139 | 7-dehydrocholesterol reductase-like                              | -0.7     | -1.5     | Yes    |
| <b>tmem97</b>       | 106581529 | transmembrane protein 97                                         | -0.3     | -0.4     | Yes    |
| <b>LOC106587488</b> | 106587488 | fibrinogen-like protein 1-like protein                           | 0.4      | 0.5      | Yes    |
| <b>LOC106601178</b> | 106601178 | NF-kappa-B inhibitor alpha-like                                  | 0.9      | 0.7      | No     |
| <b>LOC106607496</b> | 106607496 | nuclear receptor subfamily 1 group D member 1-like               | 1.0      | 1.1      | Yes    |
| <b>LOC106582110</b> | 106582110 | nuclear receptor subfamily 1 group D member 2-like               | 1.0      | 0.8      | No     |
| <b>LOC106584490</b> | 106584490 | cyclin-dependent kinase inhibitor 1B-like                        | 1.2      | 1.2      | No     |
| <b>LOC106602919</b> | 106602919 | putative monooxygenase p33MONOX                                  | 1.2      | 1.1      | No     |
| <b>LOC106601460</b> | 106601460 | serine/threonine-protein kinase SBK1-like                        | 1.4      | 0.9      | No     |
| <b>LOC106580424</b> | 106580424 | B-cell linker protein-like                                       | 1.6      | 2.2      | Yes    |
| <b>igfbp-1b1</b>    | 100136518 | IGF binding protein 1                                            | 1.8      | 1.8      | Yes    |
| <b>LOC106605529</b> | 106605529 | Krueppel-like factor 10                                          | 2.1      | 1.9      | No     |
| <b>LOC106608133</b> | 106608133 | type III iodothyronine deiodinase-like                           | 2.3      | 2.5      | Yes    |
| <b>LOC106585060</b> | 106585060 | B-cell linker protein-like                                       | 2.3      | 1.9      | No     |
| <b>LOC106574392</b> | 106574392 | ladderlectin-like                                                | 3.8      | 4.8      | Yes    |
| <b>LOC106590962</b> | 106590962 | ladderlectin-like                                                | 7.0      | 6.3      | No     |

**Supplementary Table 8.** Enriched KEGG pathways for DEGs (adjusted p-value < 0.05).

| Dataset      | KEGG ID                | Description                                | GeneRatio <sup>a</sup> | BgRatio <sup>b</sup> | Adjusted p-value <sup>c</sup> | Sig <sup>d</sup> |
|--------------|------------------------|--------------------------------------------|------------------------|----------------------|-------------------------------|------------------|
| <b>L2:L1</b> | sasa00100              | Steroid biosynthesis                       | 9/38                   | 32/13972             | 3.7E-15                       | **               |
| <b>L3:L1</b> | sasa00100              | Steroid biosynthesis                       | 18/107                 | 32/13972             | 6.7E-29                       | **               |
|              | sasa00900              | Terpenoid backbone biosynthesis            | 9/107                  | 34/13972             | 1.2E-10                       | **               |
|              | sasa03320              | PPAR signaling pathway                     | 10/107                 | 173/13972            | 2.3E-05                       | **               |
|              | sasa01212              | Fatty acid metabolism                      | 8/107                  | 137/13972            | 2.1E-04                       | **               |
|              | sasa01200              | Carbon metabolism                          | 11/107                 | 303/13972            | 3.4E-04                       | **               |
|              | sasa00620              | Pyruvate metabolism                        | 5/107                  | 89/13972             | 8.5E-03                       | **               |
|              | sasa04146              | Peroxisome                                 | 6/107                  | 173/13972            | 2.6E-02                       | *                |
|              | sasa00650              | Butanoate metabolism                       | 3/107                  | 37/13972             | 2.8E-02                       | *                |
|              | sasa01040              | Biosynthesis of unsaturated fatty acids    | 4/107                  | 78/13972             | 2.8E-02                       | *                |
|              | sasa00061              | Fatty acid biosynthesis                    | 3/107                  | 39/13972             | 2.8E-02                       | *                |
|              | sasa00260              | Glycine, serine and threonine metabolism   | 4/107                  | 82/13972             | 2.8E-02                       | *                |
|              | sasa00760              | Nicotinate and nicotinamide metabolism     | 4/107                  | 88/13972             | 3.1E-02                       | *                |
|              | sasa00072              | Synthesis and degradation of ketone bodies | 2/107                  | 14/13972             | 3.1E-02                       | *                |
|              | sasa01230              | Biosynthesis of amino acids                | 6/107                  | 207/13972            | 3.1E-02                       | *                |
|              | sasa00740              | Riboflavin metabolism                      | 2/107                  | 16/13972             | 3.7E-02                       | *                |
| sasa00480    | Glutathione metabolism | 4/107                                      | 107/13972              | 4.9E-02              | *                             |                  |

<sup>a</sup>Gene ratio as (# of DEGs in the pathway) / (# of DEGs). <sup>b</sup>Background ratio as (# of genes in the pathway) / (# of genes in KEGG). <sup>c</sup>Calculated by hypergeometric test on odds ratio and adjusted by Benjamini-Hochberg. <sup>d</sup>Statistical significance as "\*" indicating adjusted p-value < 0.05 and "\*\*\*" indicating adjusted p-value < 0.01.

**Supplementary Table 9.** Classes and related pathways of the enriched KEGG pathways by ORA.

| Pathway                                          | KEGG ID   | Class                                               | Related pathways                                              |
|--------------------------------------------------|-----------|-----------------------------------------------------|---------------------------------------------------------------|
| <b>Steroid biosynthesis</b>                      | sasa00100 | Metabolism/Lipid metabolism                         | sasa00120 Primary bile acid biosynthesis                      |
|                                                  |           |                                                     | sasa00140 Steroid hormone biosynthesis                        |
|                                                  |           |                                                     | sasa00900 Terpenoid backbone biosynthesis                     |
| <b>Terpenoid backbone biosynthesis</b>           | sasa00900 | Metabolism/Metabolism of terpenoids and polyketides | sasa00010 Glycolysis / Gluconeogenesis                        |
|                                                  |           |                                                     | sasa00100 Steroid biosynthesis                                |
|                                                  |           |                                                     | sasa00130 Ubiquinone and other terpenoid-quinone biosynthesis |
| <b>PPAR signaling pathway</b>                    | sasa03320 | Organismal Systems/Endocrine system                 | sasa00071 Fatty acid degradation                              |
|                                                  |           |                                                     | sasa00072 Synthesis and degradation of ketone bodies          |
|                                                  |           |                                                     | sasa00120 Primary bile acid biosynthesis                      |
|                                                  |           |                                                     | sasa00564 Glycerophospholipid metabolism                      |
|                                                  |           |                                                     | sasa04920 Adipocytokine signaling pathway                     |
| <b>Fatty acid metabolism</b>                     | sasa01212 | Metabolism/Global and overview maps                 | sasa00020 Citrate cycle (TCA cycle)                           |
| <b>Carbon metabolism</b>                         | sasa01200 | Metabolism/Global and overview maps                 | -                                                             |
| <b>Pyruvate metabolism</b>                       | sasa00620 | Metabolism/Carbohydrate metabolism                  | sasa00010 Glycolysis / Gluconeogenesis                        |
|                                                  |           |                                                     | sasa00020 Citrate cycle (TCA cycle)                           |
|                                                  |           |                                                     | sasa00061 Fatty acid biosynthesis                             |
|                                                  |           |                                                     | sasa00072 Synthesis and degradation of ketone bodies          |
|                                                  |           |                                                     | sasa00260 Glycine, serine and threonine metabolism            |
|                                                  |           |                                                     | sasa00290 Valine, leucine and isoleucine biosynthesis         |
|                                                  |           |                                                     | sasa00630 Glyoxylate and dicarboxylate metabolism             |
|                                                  |           |                                                     | sasa00640 Propanoate metabolism                               |
| sasa00650 Butanoate metabolism                   |           |                                                     |                                                               |
| sasa00760 Nicotinate and nicotinamide metabolism |           |                                                     |                                                               |

**Supplementary Table 10.** Enriched GO terms for DEGs (adjusted p-value < 0.01, gene count > 4).

| Dataset      | Domain <sup>a</sup> | # Terms | Enriched terms <sup>b</sup>                                                                                                                                                                                                                                                                                                                                                                                                                                                                                                                                                                                                                                                                                                                                                                                                                                                                                                                                                                                                                                                                                                                                                                                                                                                                                                                                                                                                                                                                                                                                                                                                                                                                                                                                                                                                                                                                                                                                                          |
|--------------|---------------------|---------|--------------------------------------------------------------------------------------------------------------------------------------------------------------------------------------------------------------------------------------------------------------------------------------------------------------------------------------------------------------------------------------------------------------------------------------------------------------------------------------------------------------------------------------------------------------------------------------------------------------------------------------------------------------------------------------------------------------------------------------------------------------------------------------------------------------------------------------------------------------------------------------------------------------------------------------------------------------------------------------------------------------------------------------------------------------------------------------------------------------------------------------------------------------------------------------------------------------------------------------------------------------------------------------------------------------------------------------------------------------------------------------------------------------------------------------------------------------------------------------------------------------------------------------------------------------------------------------------------------------------------------------------------------------------------------------------------------------------------------------------------------------------------------------------------------------------------------------------------------------------------------------------------------------------------------------------------------------------------------------|
| <b>L2:L1</b> | BP                  | 1       | lipid biosynthetic process (GO:0008610)                                                                                                                                                                                                                                                                                                                                                                                                                                                                                                                                                                                                                                                                                                                                                                                                                                                                                                                                                                                                                                                                                                                                                                                                                                                                                                                                                                                                                                                                                                                                                                                                                                                                                                                                                                                                                                                                                                                                              |
|              | MF                  | 2       | monooxygenase activity (GO:0004497), oxidoreductase activity, acting on paired donors, with incorporation or reduction of molecular oxygen (GO:0016705)                                                                                                                                                                                                                                                                                                                                                                                                                                                                                                                                                                                                                                                                                                                                                                                                                                                                                                                                                                                                                                                                                                                                                                                                                                                                                                                                                                                                                                                                                                                                                                                                                                                                                                                                                                                                                              |
| <b>L3:L1</b> | CC                  | 4       | endoplasmic reticulum membrane (GO:0005789), endoplasmic reticulum subcompartment (GO:0098827), nuclear outer membrane-endoplasmic reticulum membrane network (GO:0042175), endoplasmic reticulum part (GO:0044432)                                                                                                                                                                                                                                                                                                                                                                                                                                                                                                                                                                                                                                                                                                                                                                                                                                                                                                                                                                                                                                                                                                                                                                                                                                                                                                                                                                                                                                                                                                                                                                                                                                                                                                                                                                  |
|              | BP                  | 39      | steroid metabolic process (GO:0008202), lipid biosynthetic process (GO:0008610), sterol metabolic process (GO:0016125), steroid biosynthetic process (GO:0006694), sterol biosynthetic process (GO:0016126), organic hydroxy compound metabolic process (GO:1901615), isoprenoid biosynthetic process (GO:0008299), secondary alcohol metabolic process (GO:1902652), isoprenoid metabolic process (GO:0006720), organic hydroxy compound biosynthetic process (GO:1901617), cholesterol metabolic process (GO:0008203), cellular lipid metabolic process (GO:0044255), small molecule biosynthetic process (GO:0044283), alcohol metabolic process (GO:0006066), acetyl-CoA metabolic process (GO:0006084), coenzyme metabolic process (GO:0006732), monocarboxylic acid metabolic process (GO:0032787), nucleoside bisphosphate metabolic process (GO:0033865), ribonucleoside bisphosphate metabolic process (GO:0033875), purine nucleoside bisphosphate metabolic process (GO:0034032), cofactor metabolic process (GO:0051186), alcohol biosynthetic process (GO:0046165), nucleobase-containing small molecule metabolic process (GO:0055086), organic acid biosynthetic process (GO:0016053), carboxylic acid biosynthetic process (GO:0046394), nucleotide metabolic process (GO:0009117), nucleoside phosphate metabolic process (GO:0006753), fatty acid metabolic process (GO:0006631), acyl-CoA metabolic process (GO:0006637), thioester metabolic process (GO:0035383), phospholipid biosynthetic process (GO:0008654), monocarboxylic acid biosynthetic process (GO:0072330), organophosphate biosynthetic process (GO:0090407), fatty acid biosynthetic process (GO:0006633), ribose phosphate metabolic process (GO:0019693), pyridine nucleotide metabolic process (GO:0019362), nicotinamide nucleotide metabolic process (GO:0046496), pyridine-containing compound metabolic process (GO:0072524), oxidation-reduction coenzyme metabolic process (GO:0006733) |
|              | MF                  | 9       | coenzyme binding (GO:0050662), monooxygenase activity (GO:0004497), oxidoreductase activity, acting on the CH-OH group of donors, NAD or NADP as acceptor (GO:0016616), oxidoreductase activity, acting on CH-OH group of donors (GO:0016614), oxidoreductase activity, acting on paired donors, with incorporation or reduction of molecular oxygen (GO:0016705), iron ion binding (GO:0005506), flavin adenine dinucleotide binding (GO:0050660), heme binding (GO:0020037), tetrapyrrole binding (GO:0046906)                                                                                                                                                                                                                                                                                                                                                                                                                                                                                                                                                                                                                                                                                                                                                                                                                                                                                                                                                                                                                                                                                                                                                                                                                                                                                                                                                                                                                                                                     |

<sup>a</sup>CC (cell component), BP (biological process), MF (molecular function). <sup>b</sup>Enriched terms are sorted by adjusted p-values with the most significant one listed first.

**Supplementary Table 11.** Enriched pathways for DEGs by GSEA (adjusted p-value < 0.01).

| Dataset      | Down/Up | # Pathways | Enriched pathways                                                                                                                                                                                                                                                                                                                                                                                                                                                                                                                                                                                                                                                                                                                                                                                                                                                                                                                                                                                                                                                                                                                                                                                                                                                                                                                                                                                                                                                                                                                                 |
|--------------|---------|------------|---------------------------------------------------------------------------------------------------------------------------------------------------------------------------------------------------------------------------------------------------------------------------------------------------------------------------------------------------------------------------------------------------------------------------------------------------------------------------------------------------------------------------------------------------------------------------------------------------------------------------------------------------------------------------------------------------------------------------------------------------------------------------------------------------------------------------------------------------------------------------------------------------------------------------------------------------------------------------------------------------------------------------------------------------------------------------------------------------------------------------------------------------------------------------------------------------------------------------------------------------------------------------------------------------------------------------------------------------------------------------------------------------------------------------------------------------------------------------------------------------------------------------------------------------|
| <b>L2:L1</b> | Down    | 23         | Steroid biosynthesis (sasa00100), Terpenoid backbone biosynthesis (sasa00900), Glycine, serine and threonine metabolism (sasa00260), Aminoacyl-tRNA biosynthesis (sasa00970), Cysteine and methionine metabolism (sasa00270), Butanoate metabolism (sasa00650), Synthesis and degradation of ketone bodies (sasa00072), Ribosome biogenesis in eukaryotes (sasa03008), Arginine and proline metabolism (sasa00330), Alanine, aspartate and glutamate metabolism (sasa00250), Biosynthesis of amino acids (sasa01230), Valine, leucine and isoleucine degradation (sasa00280), Selenocompound metabolism (sasa00450), Fatty acid metabolism (sasa01212), Fatty acid degradation (sasa00071), Glutathione metabolism (sasa00480), Carbon metabolism (sasa01200), PPAR signaling pathway (sasa03320), Insulin signaling pathway (sasa04910), p53 signaling pathway (sasa04115), Peroxisome (sasa04146), Wnt signaling pathway (sasa04310), Lysosome (sasa04142)                                                                                                                                                                                                                                                                                                                                                                                                                                                                                                                                                                                      |
|              | Up      | 7          | Intestinal immune network for IgA production (sasa04672), Cytokine-cytokine receptor interaction (sasa04060), Ribosome (sasa03010), AGE-RAGE signaling pathway in diabetic complications (sasa04933), NOD-like receptor signaling pathway (sasa04621), C-type lectin receptor signaling pathway (sasa04625), Cell adhesion molecules (CAMs) (sasa04514)                                                                                                                                                                                                                                                                                                                                                                                                                                                                                                                                                                                                                                                                                                                                                                                                                                                                                                                                                                                                                                                                                                                                                                                           |
| <b>L3:L1</b> | Down    | 39         | Steroid biosynthesis (sasa00100), DNA replication (sasa03030), Terpenoid backbone biosynthesis (sasa00900), Mismatch repair (sasa03430), Aminoacyl-tRNA biosynthesis (sasa00970), Ribosome biogenesis in eukaryotes (sasa03008), Fatty acid metabolism (sasa01212), Ribosome (sasa03010), Base excision repair (sasa03410), Oxidative phosphorylation (sasa00190), Biosynthesis of unsaturated fatty acids (sasa01040), Glyoxylate and dicarboxylate metabolism (sasa00630), Propanoate metabolism (sasa00640), Proteasome (sasa03050), Carbon metabolism (sasa01200), Fatty acid biosynthesis (sasa00061), Glutathione metabolism (sasa00480), Homologous recombination (sasa03440), alpha-Linolenic acid metabolism (sasa00592), Nucleotide excision repair (sasa03420), Butanoate metabolism (sasa00650), Pyruvate metabolism (sasa00620), Fanconi anemia pathway (sasa03460), Valine, leucine and isoleucine degradation (sasa00280), Citrate cycle (TCA cycle) (sasa00020), Synthesis and degradation of ketone bodies (sasa00072), Spliceosome (sasa03040), Glycine, serine and threonine metabolism (sasa00260), Fatty acid elongation (sasa00062), RNA transport (sasa03013), Arachidonic acid metabolism (sasa00590), Cell cycle (sasa04110), Arginine and proline metabolism (sasa00330), Fatty acid degradation (sasa00071), Biosynthesis of amino acids (sasa01230), Alanine, aspartate and glutamate metabolism (sasa00250), RNA polymerase (sasa03020), Cysteine and methionine metabolism (sasa00270), RNA degradation (sasa03018) |
|              | Up      | 10         | ECM-receptor interaction (sasa04512), Cell adhesion molecules (CAMs) (sasa04514), Cytokine-cytokine receptor interaction (sasa04060), Adherens junction (sasa04520), Intestinal immune network for IgA production (sasa04672), AGE-RAGE signaling pathway in diabetic complications (sasa04933), Phosphatidylinositol signaling system (sasa04070), Inositol phosphate metabolism (sasa00562), Vascular smooth muscle contraction (sasa04270), ErbB signaling pathway (sasa04012)                                                                                                                                                                                                                                                                                                                                                                                                                                                                                                                                                                                                                                                                                                                                                                                                                                                                                                                                                                                                                                                                 |

<sup>a</sup>Down (down-regulated) or Up (up-regulated) pathways. <sup>b</sup>Enriched pathways are sorted by adjusted p-values with the most significant one listed first.



**Supplementary Table 12.** GSEA enriched pathways common in both L2:L1 and L3:L1.

| Enriched pathways                                    | KEGG ID   | NES (L2:L1) <sup>a</sup> | NES (L3:L1) <sup>a</sup> |
|------------------------------------------------------|-----------|--------------------------|--------------------------|
| Steroid biosynthesis                                 | sasa00100 | -2.53                    | -2.76                    |
| Terpenoid backbone biosynthesis                      | sasa00900 | -2.31                    | -2.47                    |
| Glycine, serine and threonine metabolism             | sasa00260 | -2.24                    | -1.71                    |
| Aminoacyl-tRNA biosynthesis                          | sasa00970 | -2.17                    | -2.24                    |
| Cysteine and methionine metabolism                   | sasa00270 | -2.12                    | -1.53                    |
| Butanoate metabolism                                 | sasa00650 | -1.94                    | -1.87                    |
| Synthesis and degradation of ketone bodies           | sasa00072 | -1.85                    | -1.75                    |
| Ribosome biogenesis in eukaryotes                    | sasa03008 | -1.82                    | -2.24                    |
| Arginine and proline metabolism                      | sasa00330 | -1.81                    | -1.61                    |
| Alanine, aspartate and glutamate metabolism          | sasa00250 | -1.79                    | -1.55                    |
| Biosynthesis of amino acids                          | sasa01230 | -1.75                    | -1.56                    |
| Valine, leucine and isoleucine degradation           | sasa00280 | -1.74                    | -1.79                    |
| Fatty acid metabolism                                | sasa01212 | -1.72                    | -2.20                    |
| Fatty acid degradation                               | sasa00071 | -1.65                    | -1.57                    |
| Glutathione metabolism                               | sasa00480 | -1.61                    | -1.94                    |
| Carbon metabolism                                    | sasa01200 | -1.59                    | -1.97                    |
| Cell adhesion molecules (CAMs)                       | sasa04514 | 1.37                     | 1.66                     |
| AGE-RAGE signaling pathway in diabetic complications | sasa04933 | 1.45                     | 1.48                     |
| Ribosome                                             | sasa03010 | 1.57                     | -2.19                    |
| Cytokine-cytokine receptor interaction               | sasa04060 | 1.64                     | 1.66                     |
| Intestinal immune network for IgA production         | sasa04672 | 1.75                     | 1.51                     |

<sup>a</sup>Negative NES (normalized enrichment score) values indicate down-regulation, whereas positive NES values indicate up-regulation.

**Supplementary Table 13.** Read alignment of 21 RRBS samples on the Salmon genome.

| No | Name | Diet | Sex | Total reads | % Aligned <sup>a</sup> | # Aligned Cs <sup>b</sup> | % CpGs <sup>c</sup> | Methylation rate <sup>d</sup> |
|----|------|------|-----|-------------|------------------------|---------------------------|---------------------|-------------------------------|
| 1  | L1   | L2   | M   | 64 938 299  | 47.67                  | 326 750 266               | 21.05               | 84.77                         |
| 2  | L6   | L3   | M   | 61 742 432  | 46.87                  | 307 091 088               | 20.93               | 84.51                         |
| 3  | L7   | L3   | F   | 52 579 647  | 48.64                  | 272 484 899               | 20.92               | 84.6                          |
| 4  | L11  | L1   | M   | 68 986 028  | 48.76                  | 353 798 160               | 20.89               | 83.85                         |
| 5  | L12  | L1   | F   | 73 106 174  | 47.7                   | 369 892 480               | 21.01               | 84.69                         |
| 6  | L13  | L1   | F   | 65 180 703  | 47.26                  | 325 973 342               | 20.91               | 84.25                         |
| 7  | L14  | L1   | F   | 42 920 963  | 47.91                  | 213 558 541               | 20.9                | 83.73                         |
| 8  | L16  | L2   | F   | 68 898 332  | 46.74                  | 345 631 982               | 20.88               | 84.28                         |
| 9  | L18  | L2   | M   | 70 070 490  | 47.67                  | 353 591 304               | 20.87               | 84.34                         |
| 10 | L20  | L2   | F   | 52 527 471  | 48.55                  | 268 129 597               | 20.86               | 83.57                         |
| 11 | L22  | L1   | M   | 53 584 633  | 45.99                  | 262 714 857               | 20.86               | 84.68                         |
| 12 | L23  | L1   | M   | 93 411 879  | 48.67                  | 476 236 067               | 21.09               | 85.12                         |
| 13 | L24  | L1   | M   | 49 281 151  | 47.74                  | 247 448 574               | 21                  | 83.79                         |
| 14 | L26  | L3   | M   | 55 156 176  | 47.16                  | 276 699 136               | 20.94               | 84.07                         |
| 15 | L28  | L3   | F   | 70 063 826  | 47.9                   | 349 040 205               | 21.13               | 84.73                         |
| 16 | L30  | L3   | F   | 74 423 657  | 47.36                  | 371 927 481               | 20.97               | 84.37                         |
| 17 | L32  | L2   | M   | 58 784 680  | 48.12                  | 297 408 787               | 21.02               | 84.51                         |
| 18 | L33  | L2   | F   | 56 337 641  | 46.95                  | 279 726 633               | 20.95               | 84.81                         |
| 19 | L38  | L3   | F   | 58 371 657  | 47.76                  | 293 090 760               | 20.96               | 84.5                          |
| 20 | L42  | L1   | F   | 61 552 817  | 47.62                  | 312 335 351               | 20.84               | 84.58                         |
| 21 | L43  | L1   | F   | 46 490 239  | 47.69                  | 236 010 085               | 20.71               | 83.43                         |

<sup>a</sup>Percentage of uniquely aligned reads. <sup>b</sup>Number of Cs among the uniquely aligned regions. <sup>c</sup>Percentage of CpG sites among the aligned Cs. <sup>d</sup>Average methylation rate calculated from all mapped CpG sites

**Supplementary Table 14.** Distributions of the mapped CpGs in and around mRNAs.

| Region     | # Nucleotides <sup>a</sup> | (%)     | # Mapped CpGs | (%)     | Odds ratio <sup>b</sup> | P-value <sup>c</sup> |
|------------|----------------------------|---------|---------------|---------|-------------------------|----------------------|
| Exon       | 128 738 024                | (2.2%)  | 26 899        | (11.6%) | 5.3                     | 0                    |
| Intron     | 999 945 268                | (16.9%) | 92 681        | (39.9%) | 2.4                     | 0                    |
| P250       | 11 628 692                 | (0.2%)  | 1 338         | (0.6%)  | 2.9                     | 5.8E-246             |
| P1K        | 32 875 941                 | (1%)    | 2 260         | (1%)    | 1.8                     | 5.8E-133             |
| P6K        | 187 371 613                | (3.2%)  | 13 805        | (5.9%)  | 1.9                     | 0                    |
| Flanks     | 412 209 951                | (7%)    | 23 199        | (10.0%) | 1.4                     | 0                    |
| Intergenic | 4 161 010 917              | (70.1%) | 72 348        | (31.1%) | 0.4                     | 0                    |

<sup>a</sup>Number of the nucleotides found in the whole genome. <sup>b</sup>Ratio calculated as A/B where A = (# nucleotides in a region) / (total # of nucleotides in all regions) and B = (# mapped CpGs of in a region) / (total # of mapped CpGs in all regions). <sup>c</sup>Calculated by hypergeometric test on odds ratio.

**Supplementary Table 15.** Distributions of DMCs in mRNAs and their surroundings.

| Dataset      | Region       | # Mapped CpGs | (%)     | # DMCs  | (%)     | Odds ratio <sup>a</sup> | P-value <sup>b</sup> | Sig <sup>c</sup> |
|--------------|--------------|---------------|---------|---------|---------|-------------------------|----------------------|------------------|
| <b>L2:L1</b> | Exon         | 32 424        | (11.8%) | 301     | (8.0%)  | 0.68                    | 2.0E-14              | *                |
|              | Intron       | 108 703       | (39.6%) | 1 446   | (38.6%) | 0.97                    | 1.1E-01              |                  |
|              | P250         | 1 625         | (0.6%)  | 17      | (0.5%)  | 0.77                    | 1.6E-01              |                  |
|              | P1K          | 2 616         | (1.0%)  | 62      | (1.7%)  | 1.74                    | 3.3E-05              | **               |
|              | P6K          | 16 262        | (5.9%)  | 276     | (7.4%)  | 1.24                    | 1.5E-04              | **               |
|              | Flanks       | 27 576        | (10.0%) | 419     | (11.2%) | 1.11                    | 1.1E-02              | **               |
|              | Intergenic   | 85 359        | (31.1%) | 1 226   | (32.7%) | 1.05                    | 1.6E-02              | *                |
|              | <b>L3:L1</b> | Exon          | 32 649  | (11.7%) | 338     | (9.1%)                  | 0.77                 | 7.5E-08          |
| Intron       | 110 395      | (39.6%)       | 1 401   | (37.5%) | 0.95    | 4.1E-03                 | **                   |                  |
| P250         | 1 652        | (0.6%)        | 19      | (0.5%)  | 0.86    | 2.9E-01                 |                      |                  |
| P1K          | 2 676        | (1.0%)        | 68      | (1.8%)  | 1.90    | 8.2E-07                 | **                   |                  |
| P6K          | 16 483       | (5.9%)        | 265     | (7.1%)  | 1.20    | 1.5E-03                 | **                   |                  |
| Flanks       | 27 923       | (10.0%)       | 464     | (12.4%) | 1.24    | 1.0E-06                 | **                   |                  |
| Intergenic   | 86 796       | (31.2%)       | 1 179   | (31.6%) | 1.01    | 3.0E-01                 |                      |                  |

<sup>a</sup>Ratio calculated as A/B where A = (# mapped CpGs of in region) / (total # of mapped CpGs in all regions) and B = (# DMCs in a region / (total # of DMCs in all regions). <sup>b</sup>Calculated by hypergeometric test on odds ratio of >1. <sup>c</sup>Statistically significant as \* and \*\* indicating p-values < 0.05 and 0.01, respectively.

**Supplementary Table 16.** Enriched GO terms for DMGs in L2:L1 (adjusted p-value < 0.001, gene count > 9).

| Domain <sup>a</sup> | GO ID      | GO term                                                         | Region (gene ratio)                                                 |
|---------------------|------------|-----------------------------------------------------------------|---------------------------------------------------------------------|
| CC                  | GO:0044456 | synapse part                                                    | Gene body (25/734), Intron (23/613), RS+GB (29/1031)                |
|                     | GO:0045202 | synapse                                                         | P+GB (32/880), Gene body (31/734), Intron (28/613), RS+GB (35/1031) |
| BP                  | GO:0007156 | homophilic cell adhesion via plasma membrane adhesion molecules | Gene body (27/527)                                                  |
|                     | GO:0007268 | chemical synaptic transmission                                  | P+GB (20/628), Gene body (18/527)                                   |
|                     | GO:0007399 | nervous system development                                      | P+GB (42/628), Gene body (37/527), Intron (31/423), RS+GB (46/741)  |
|                     | GO:0032879 | regulation of localization                                      | P+GB (38/628), Gene body (33/527)                                   |
|                     | GO:0051049 | regulation of transport                                         | P+GB (33/628), Gene body (29/527)                                   |
|                     | GO:0098609 | cell-cell adhesion                                              | Gene body (31/527)                                                  |
|                     | GO:0098742 | cell-cell adhesion via plasma-membrane adhesion molecules       | Gene body (28/527)                                                  |
|                     | GO:0098916 | anterograde trans-synaptic signaling                            | P+GB (20/628), Gene body (18/527)                                   |
|                     | GO:0099536 | synaptic signaling                                              | P+GB (20/628), Gene body (18/527)                                   |
|                     | GO:0099537 | trans-synaptic signaling                                        | P+GB (20/628), Gene body (18/527)                                   |
| MF                  | GO:0004970 | ionotropic glutamate receptor activity                          | P+GB (13/1062), RS+GB (15/1245)                                     |
|                     | GO:0005230 | extracellular ligand-gated ion channel activity                 | RS+GB (26/1245)                                                     |
|                     | GO:0008066 | glutamate receptor activity                                     | P+GB (13/1062), RS+GB (15/1245)                                     |
|                     | GO:0008146 | sulfotransferase activity                                       | RS+GB (18/1245)                                                     |
|                     | GO:0015276 | ligand-gated ion channel activity                               | P+GB (30/1062), RS+GB (34/1245)                                     |
|                     | GO:0022834 | ligand-gated channel activity                                   | P+GB (30/1062), RS+GB (34/1245)                                     |

<sup>a</sup>CC (cell component), BP (biological process), MF (molecular function).

**Supplementary Table 17.** Enriched GO terms for DMGs in L3:L1 (adjusted p-value < 0.001, gene count > 9).

| Domain <sup>a</sup> | GO ID      | GO term                                                         | Region (gene ratio)                                                  |
|---------------------|------------|-----------------------------------------------------------------|----------------------------------------------------------------------|
| CC                  | GO:0044456 | synapse part                                                    | P+GB (26/854), Gene body (26/720), Intron (26/606)                   |
|                     | GO:0045202 | synapse                                                         | P+GB (31/854), Gene body (31/720), Intron (31/606), RS+GB (32/1009)  |
|                     | GO:0045211 | postsynaptic membrane                                           | P+GB (17/854), Gene body (17/720), Intron (17/606), RS+GB (18/1009)  |
|                     | GO:0097060 | synaptic membrane                                               | P+GB (17/854), Gene body (17/720), Intron (17/606), RS+GB (18/1009)  |
|                     | GO:0098590 | plasma membrane region                                          | P+GB (21/854), Gene body (21/720), Intron (20/606), RS+GB (23/1009)  |
|                     | GO:0098794 | postsynapse                                                     | Gene body (17/720), Intron (17/606)                                  |
| BP                  | GO:0007156 | homophilic cell adhesion via plasma membrane adhesion molecules | P+GB (33/627), Gene body (32/513), Intron (26/417)                   |
|                     | GO:0007267 | cell-cell signaling                                             | P+GB (34/627), Intron (27/417)                                       |
|                     | GO:0007268 | chemical synaptic transmission                                  | P+GB (21/627), Gene body (19/513), Intron (18/417)                   |
|                     | GO:0098609 | cell-cell adhesion                                              | P+GB (36/627), Gene body (35/513), Intron (29/417)                   |
|                     | GO:0098742 | cell-cell adhesion via plasma-membrane adhesion molecules       | P+GB (33/627), Gene body (32/513), Intron (26/417)                   |
|                     | GO:0098916 | anterograde trans-synaptic signaling                            | P+GB (21/627), Gene body (19/513), Intron (18/417)                   |
|                     | GO:0099536 | synaptic signaling                                              | P+GB (21/627), Gene body (19/513), Intron (18/417)                   |
|                     | GO:0099537 | trans-synaptic signaling                                        | P+GB (21/627), Gene body (19/513), Intron (18/417)                   |
| MF                  | GO:0004970 | ionotropic glutamate receptor activity                          | P+GB (16/1016), Gene body (16/847), Intron (16/703), RS+GB (17/1228) |
|                     | GO:0005230 | extracellular ligand-gated ion channel activity                 | Intron (20/703)                                                      |
|                     | GO:0008066 | glutamate receptor activity                                     | P+GB (16/1016), Gene body (16/847), Intron (16/703), RS+GB (17/1228) |
|                     | GO:0015276 | ligand-gated ion channel activity                               | Intron (23/703)                                                      |
|                     | GO:0022824 | transmitter-gated ion channel activity                          | P+GB (18/1016), Gene body (18/847), Intron (18/703), RS+GB (19/1228) |
|                     | GO:0022834 | ligand-gated channel activity                                   | Intron (23/703)                                                      |
|                     | GO:0022835 | transmitter-gated channel activity                              | P+GB (18/1016), Gene body (18/847), Intron (18/703), RS+GB (19/1228) |
|                     | GO:0030594 | neurotransmitter receptor activity                              | P+GB (26/1016), Gene body (25/847), Intron (25/703), RS+GB (27/1228) |

<sup>a</sup>CC (cell component), BP (biological process), MF (molecular function).

**Supplementary Table 18.** The number of common DMCs and DMGs between L2:L1 and L3:L1.

| <b>Region</b> | <b># of common DMCs</b> | <b># of common DMGs</b> |
|---------------|-------------------------|-------------------------|
| Exon          | 43                      | 38                      |
| Intron        | 194                     | 176                     |
| P1K           | 9                       | 9                       |
| P250          | 2                       | 2                       |
| P6K           | 43                      | 33                      |
| Flanks        | 70                      | 61                      |
| <b>Total</b>  | <b>361</b>              | <b>319</b>              |

**Supplementary Table 19.** DMGs with at least two common DMCs between L2:L1 and L3:L1.

| Gene ID   | Symbol       | Region | Gene name                                                     | # DMCs | Hypo/Hyper |       | Matched |
|-----------|--------------|--------|---------------------------------------------------------------|--------|------------|-------|---------|
|           |              |        |                                                               |        | L2:L1      | L3:L1 |         |
| 106574316 | LOC106574316 | P6K    | T-cell-specific surface glycoprotein CD28-like                | 5      | 0/5        | 0/5   | Yes     |
| 106578606 | LOC106578606 | Exon   | homeobox protein engrailed-2a-like                            | 5      | 5/0        | 5/0   | Yes     |
| 106590111 | LOC106590111 | Intron | disks large-associated protein 1-like                         | 4      | 0/4        | 0/4   | Yes     |
| 106560380 | LOC106560380 | Intron | rho GTPase-activating protein 39-like                         | 3      | 1/2        | 1/2   | Yes     |
| 106579972 | LOC106579972 | Flanks | calcium-binding mitochondrial carrier protein SCaMC-2-A-like  | 3      | 3/0        | 3/0   | Yes     |
| 106586910 | LOC106586910 | Flanks | zinc finger CCCH domain-containing protein 15-like            | 3      | 3/0        | 3/0   | Yes     |
| 100380475 | nt5d1        | P6K    | 5-nucleotidase domain-containing protein 1                    | 2      | 0/2        | 0/2   | Yes     |
| 106561885 | kif6         | Intron | kinesin family member 6                                       | 2      | 0/2        | 0/2   | Yes     |
| 106562128 | LOC106562128 | P6K    | meiotic recombination protein REC114-like                     | 2      | 0/2        | 0/2   | Yes     |
| 106562942 | ankra2       | P6K    | ankyrin repeat family A member 2                              | 2      | 0/2        | 0/2   | Yes     |
| 106563039 | LOC106563039 | Flanks | homeobox protein orthopedia B-like                            | 2      | 2/0        | 2/0   | Yes     |
| 106563583 | LOC106563583 | Intron | MAP7 domain-containing protein 2-like                         | 2      | 0/2        | 0/2   | Yes     |
| 106566691 | LOC106566691 | Flanks | vesicle-associated membrane protein-associated protein B-like | 2      | 0/2        | 0/2   | Yes     |
| 106568947 | LOC106568947 | Exon   | cAMP-specific 3',5'-cyclic phosphodiesterase 4D-like          | 2      | 0/2        | 0/2   | Yes     |
| 106570019 | LOC106570019 | P6K    | zinc finger MYM-type protein 4-like                           | 2      | 2/0        | 2/0   | Yes     |
| 106576329 | LOC106576329 | Intron | liprin-alpha-2-like                                           | 2      | 2/0        | 2/0   | Yes     |
| 106576938 | LOC106576938 | Intron | potassium channel subfamily K member 18-like                  | 2      | 0/2        | 0/2   | Yes     |
| 106580649 | LOC106580649 | Flanks | 60S ribosomal protein L35a                                    | 2      | 0/2        | 0/2   | Yes     |
| 106580806 | LOC106580806 | Intron | limbic system-associated membrane protein-like                | 2      | 0/2        | 0/2   | Yes     |
| 106580848 | LOC106580848 | Intron | sodium/calcium exchanger 2-like                               | 2      | 2/0        | 2/0   | Yes     |
| 106582848 | LOC106582848 | Intron | contactin-3-like                                              | 2      | 0/2        | 0/2   | Yes     |
| 106585555 | LOC106585555 | Flanks | glial fibrillary acidic protein-like                          | 2      | 0/2        | 0/2   | Yes     |
| 106598174 | grk7         | P6K    | G protein-coupled receptor kinase 7                           | 2      | 0/2        | 0/2   | Yes     |
| 106602730 | map9         | Flanks | microtubule associated protein 9                              | 2      | 0/2        | 0/2   | Yes     |
| 106603642 | LOC106603642 | Intron | cell adhesion molecule 1-like                                 | 2      | 2/0        | 2/0   | Yes     |
| 106607780 | LOC106607780 | Intron | protein FAM184A-like                                          | 2      | 0/2        | 0/2   | Yes     |
| 106607986 | LOC106607986 | Intron | uronyl 2-sulfotransferase-like                                | 2      | 0/2        | 2/0   | No      |
| 106608148 | LOC106608148 | P6K    | disks large-associated protein 2-like                         | 2      | 0/2        | 0/2   | Yes     |
| 106610332 | LOC106610332 | Intron | hydroperoxide isomerase ALOXE3-like                           | 2      | 0/2        | 0/2   | Yes     |
| 106611463 | pacs2        | Intron | phosphofurin acidic cluster sorting protein 2                 | 2      | 0/2        | 0/2   | Yes     |
| 106613191 | LOC106613191 | Intron | roundabout homolog 2-like                                     | 2      | 2/0        | 2/0   | Yes     |



**Supplementary Table 20.** Associated GO terms for common DMGs between L2:L1 and L3:L1.

| Gene name                                                    | Signaling related <sup>†</sup>                                                                                                                                                                                                                            | Synapse related <sup>†</sup>   | Immune response related <sup>†</sup>                                                                                                                                                                                                                                                                                                                                                                                                          | Others <sup>†</sup>                                                                                                                                                                                                                                                                                                                                                                                                                                                                                                                          |
|--------------------------------------------------------------|-----------------------------------------------------------------------------------------------------------------------------------------------------------------------------------------------------------------------------------------------------------|--------------------------------|-----------------------------------------------------------------------------------------------------------------------------------------------------------------------------------------------------------------------------------------------------------------------------------------------------------------------------------------------------------------------------------------------------------------------------------------------|----------------------------------------------------------------------------------------------------------------------------------------------------------------------------------------------------------------------------------------------------------------------------------------------------------------------------------------------------------------------------------------------------------------------------------------------------------------------------------------------------------------------------------------------|
| T-cell-specific surface glycoprotein CD28-like               | cytokine biosynthetic process, apoptotic signaling pathway, cell surface receptor signaling pathway, positive regulation of phosphatidylinositol 3-kinase signaling, positive regulation of protein kinase B signaling, T cell receptor signaling pathway | -                              | humoral immune response, immune system process, positive regulation of inflammatory response to antigenic stimulus, positive regulation of interleukin-10 production, positive regulation of interleukin-2 biosynthetic process, positive regulation of interleukin-4 production, positive regulation of isotype switching to IgG isotypes, positive regulation of viral genome replication, regulation of defense response to virus by virus | negative regulation of apoptotic process, negative regulation of gene expression, negative thymic T cell selection, positive regulation of alpha-beta T cell proliferation, positive regulation of gene expression, positive regulation of mitotic nuclear division, positive regulation of T cell proliferation, positive regulation of transcription by RNA polymerase II, positive regulation of translation, regulation of regulatory T cell differentiation, regulatory T cell differentiation, T cell activation, T cell costimulation |
| homeobox protein engrailed-2a-like                           | -                                                                                                                                                                                                                                                         | -                              | axonogenesis involved in innervation, neuron differentiation                                                                                                                                                                                                                                                                                                                                                                                  | anterior/posterior pattern specification, apoptotic process involved in morphogenesis, cell fate specification, midbrain development, midbrain-hindbrain boundary development, midbrain-hindbrain boundary morphogenesis, regulation of transcription by RNA polymerase II                                                                                                                                                                                                                                                                   |
| disks large-associated protein 1-like                        | -                                                                                                                                                                                                                                                         | chemical synaptic transmission | -                                                                                                                                                                                                                                                                                                                                                                                                                                             | -                                                                                                                                                                                                                                                                                                                                                                                                                                                                                                                                            |
| rho GTPase-activating protein 39-like                        | regulation of small GTPase mediated signal transduction, signal transduction                                                                                                                                                                              | postsynapse organization       | -                                                                                                                                                                                                                                                                                                                                                                                                                                             | -                                                                                                                                                                                                                                                                                                                                                                                                                                                                                                                                            |
| calcium-binding mitochondrial carrier protein SCaMC-2-A-like | calcium ion transmembrane transport                                                                                                                                                                                                                       | -                              | -                                                                                                                                                                                                                                                                                                                                                                                                                                             | adipose tissue development, ATP metabolic process, camera-type eye development, cellular respiration, multicellular organism growth, response to activity, response to dietary excess, response to food Source                                                                                                                                                                                                                                                                                                                               |
| zinc finger CCCH domain-containing protein 15-like           | cytokine-mediated signaling pathway                                                                                                                                                                                                                       | -                              | -                                                                                                                                                                                                                                                                                                                                                                                                                                             | cytoplasmic translation, positive regulation of GTPase activity                                                                                                                                                                                                                                                                                                                                                                                                                                                                              |

<sup>†</sup>GO terms of corresponding human orthologues were retrieved from UniProt (<https://www.uniprot.org>) and manually separated mainly by their name into four categories, signalling related, synapse related, immune response related, and others.

**Supplementary Table 21.** List of CpGs with methylation calls of the *acaca* gene common in L2:L1 and L3:L1.

| Chromosome  | Start           | End             | Strand | Region      | L2:L1           |                    |                  | L3:L1           |                    |                  |
|-------------|-----------------|-----------------|--------|-------------|-----------------|--------------------|------------------|-----------------|--------------------|------------------|
|             |                 |                 |        |             | Q-value         | Mdiff <sup>a</sup> | Sig <sup>b</sup> | Q-value         | Mdiff <sup>a</sup> | Sig <sup>b</sup> |
| NC_027312.1 | 83593310        | 83593310        | +      | Exon        | 1.06E-05        | -3.02              | *                | 3.70E-01        | -0.09              |                  |
| NC_027312.1 | 83593311        | 83593311        | -      | Exon        | 7.05E-05        | 6.15               | *                | 2.24E-03        | 4.58               | *                |
| NC_027312.1 | 83593349        | 83593349        | +      | Exon        | 5.81E-02        | 1.71               |                  | 4.36E-01        | 0.12               |                  |
| NC_027312.1 | 83623210        | 83623210        | +      | Intron      | 7.42E-04        | -2.41              | *                | 8.35E-06        | -4.81              | *                |
| NC_027312.1 | 83623218        | 83623218        | +      | Intron      | 3.44E-01        | 0.65               |                  | 2.79E-01        | 1.09               |                  |
| NC_027312.1 | 83623248        | 83623248        | +      | Intron      | 2.55E-06        | -4.82              | *                | 7.96E-05        | -3.74              | *                |
| NC_027312.1 | 83623302        | 83623302        | -      | Exon        | 2.02E-02        | 1.86               |                  | 4.03E-02        | -2.88              |                  |
| NC_027312.1 | 83652565        | 83652565        | -      | P250        | 1.26E-04        | 8.80               | *                | 3.03E-02        | 4.51               |                  |
| NC_027312.1 | 83652613        | 83652613        | +      | P250        | 1.56E-01        | 3.94               |                  | 3.48E-01        | 1.43               |                  |
| NC_027312.1 | <b>83652614</b> | <b>83652614</b> | -      | <b>P250</b> | <b>3.92E-17</b> | <b>19.83</b>       | *                | <b>1.15E-30</b> | <b>24.72</b>       | <b>**</b>        |
| NC_027312.1 | 83652620        | 83652620        | +      | P250        | 5.05E-04        | -12.65             | *                | 2.43E-03        | -10.72             | *                |
| NC_027312.1 | 83652631        | 83652631        | +      | P250        | 1.27E-01        | -3.98              |                  | 1.69E-03        | -10.53             | *                |
| NC_027312.1 | 83652654        | 83652654        | +      | P250        | 3.57E-01        | -1.35              |                  | 2.01E-01        | 3.29               |                  |
| NC_027312.1 | <b>83652756</b> | <b>83652756</b> | -      | <b>P250</b> | <b>1.07E-02</b> | <b>10.26</b>       |                  | <b>8.45E-08</b> | <b>20.02</b>       | <b>**</b>        |
| NC_027312.1 | <b>83652793</b> | <b>83652793</b> | -      | <b>P1K</b>  | <b>5.67E-07</b> | <b>18.87</b>       | *                | <b>6.88E-13</b> | <b>23.78</b>       | <b>**</b>        |
| NC_027312.1 | <b>83652803</b> | <b>83652803</b> | -      | <b>P1K</b>  | <b>2.58E-05</b> | <b>17.54</b>       | *                | <b>4.02E-08</b> | <b>20.91</b>       | <b>**</b>        |
| NC_027312.1 | 83655043        | 83655043        | -      | P6K         | 1.92E-01        | 1.28               |                  | 5.04E-03        | -4.85              | *                |
| NC_027312.1 | 83655046        | 83655046        | -      | P6K         | 2.06E-03        | 1.59               | *                | 4.03E-07        | -6.47              | *                |
| NC_027312.1 | 83655054        | 83655054        | -      | P6K         | 1.30E-02        | -2.94              |                  | 4.36E-01        | -0.12              |                  |
| NC_027312.1 | 83655073        | 83655073        | -      | P6K         | 2.51E-01        | 0.72               |                  | 4.08E-01        | -0.23              |                  |
| NC_027312.1 | 83655078        | 83655078        | -      | P6K         | 4.39E-01        | 0.05               |                  | 1.09E-05        | -4.80              | *                |
| NC_027312.1 | 83655395        | 83655395        | -      | P6K         | 3.18E-02        | 3.36               |                  | 2.18E-01        | -1.27              |                  |
| NC_027312.1 | 83655424        | 83655424        | -      | P6K         | 1.68E-06        | 4.97               | *                | 1.19E-10        | 4.97               | *                |
| NC_027312.1 | 83655440        | 83655440        | -      | P6K         | 1.46E-03        | 2.12               | *                | 9.46E-04        | -3.28              | *                |
| NC_027312.1 | 83655885        | 83655885        | -      | P6K         | 6.98E-02        | 2.88               |                  | 1.15E-03        | -9.11              | *                |
| NC_027312.1 | 83655890        | 83655890        | -      | P6K         | 4.47E-01        | 0.01               |                  | 3.46E-01        | -0.76              |                  |
| NC_027312.1 | 83655915        | 83655915        | -      | P6K         | 1.47E-01        | 2.35               |                  | 6.07E-02        | -4.55              |                  |
| NC_027312.1 | 83655930        | 83655930        | -      | P6K         | 1.64E-01        | -1.56              |                  | 9.67E-02        | -2.33              |                  |
| NC_027312.1 | 83656220        | 83656220        | +      | P6K         | 2.89E-01        | 1.27               |                  | 1.22E-01        | -3.14              |                  |

<sup>a</sup>Methylation difference in percentage. <sup>a</sup>Significance level as "\*" indicating q-value < 0.01 and "\*\*\*" indicating q-value < 0.01 and methylation difference >20%.

**Supplementary Table 22.** Count comparisons of samples and DMCs between 9 and 21 samples.

| <b>Dataset</b>    | <b>Diets</b> | <b># Total<sup>a</sup></b> | <b># Treatment<sup>b</sup></b> | <b># Control<sup>c</sup></b> | <b># Total DMCs</b> | <b># hypo DMCs</b> | <b># hyper DMCs</b> |
|-------------------|--------------|----------------------------|--------------------------------|------------------------------|---------------------|--------------------|---------------------|
| <b>9 samples</b>  | L2:L1        | 7                          | 3                              | 4                            | 20 260              | 10 225             | 10 035              |
|                   | L3:L1        | 6                          | 2                              | 4                            | 33 099              | 19 162             | 13 937              |
| <b>21 samples</b> | L2:L1        | 15                         | 6                              | 9                            | 2 521               | 1 395              | 1 126               |
|                   | L3:L1        | 15                         | 6                              | 9                            | 2 555               | 1 311              | 1 244               |

<sup>a</sup>Number of samples. <sup>b</sup>Number of treatment (L2 or L3 diet) samples. <sup>c</sup>Number of control (L1 diet) samples.

**Supplementary Table 23.** Relationship of samples between RNA-seq and RRBS.

| Diet | #Samples |      | Tank <sup>a</sup> | RNA-seq <sup>b</sup> | RRBS <sup>b</sup> |
|------|----------|------|-------------------|----------------------|-------------------|
|      | RNA-seq  | RRBS |                   |                      |                   |
| L1   | 6        | 9    | 16                | <b>L11 (male)</b>    | <b>L11 (male)</b> |
|      |          |      |                   | L12 (female)         | L13 (female)      |
|      |          |      |                   | L13 (female)         | L14 (female)      |
|      |          |      |                   | L14 (female)         |                   |
|      |          |      | 19                | L21 (male)           |                   |
|      |          |      |                   | <b>L22 (male)</b>    | <b>L22 (male)</b> |
|      |          |      |                   | <b>L23 (male)</b>    | <b>L23 (male)</b> |
|      |          |      |                   | <b>L24 (male)</b>    | <b>L24 (male)</b> |
|      |          |      | 24                | L41 (male)           |                   |
|      |          |      |                   | L42 (female)         | L43 (female)      |
| L2   | 6        | 6    | 13                | <b>L1 (male)</b>     | <b>L1 (male)</b>  |
|      |          |      |                   | 18                   | L16 (female)      |
|      |          |      |                   | <b>L18 (male)</b>    | <b>L18 (male)</b> |
|      |          |      |                   | L20 (female)         |                   |
|      |          |      | 21                | L31 (male)           |                   |
|      |          |      |                   | <b>L32 (male)</b>    | <b>L32 (male)</b> |
|      |          |      |                   | L33 (female)         |                   |
|      |          |      |                   | L34 (male)           |                   |
|      |          |      |                   | L35 (male)           |                   |
|      |          |      |                   |                      |                   |
| L3   | 6        | 6    | 15                | <b>L6 (male)</b>     | <b>L6 (male)</b>  |
|      |          |      |                   | L7 (female)          |                   |
|      |          |      |                   | L9 (male)            |                   |
|      |          |      | 20                | <b>L26 (male)</b>    | <b>L26 (male)</b> |
|      |          |      |                   | L27 (male)           |                   |
|      |          |      |                   | L28 (female)         |                   |
|      |          |      |                   | L30 (female)         |                   |
|      |          |      | 23                | L36 (male)           |                   |
|      |          |      |                   | L38 (female)         |                   |
|      |          |      |                   | L40 (male)           |                   |

<sup>a</sup>Tank number used in our feeding trail. <sup>b</sup>Names of samples for RNA-seq and RRBS. Names of identical fish are emphasised in bold.

**Supplementary Table 24.** List of DEGs for L2:L1 and L3:L1.**File:** Dataset\_01\_DEG.xlsx (provided in Excel format)**Sheets:** L2L1, L3L1

|                |                  |                  |
|----------------|------------------|------------------|
| <b>Fields:</b> | Gene ID          | Entrez Gene ID   |
|                | Base mean        | Output of DESeq2 |
|                | Log2 fold change | Output of DESeq2 |
|                | P-value          | Output of DESeq2 |
|                | Adjusted p-value | Output of DESeq2 |
|                | Gene symbol      | Gene symbol      |
|                | Gene name        | Gene name        |

**Supplementary Table 25.** List of enriched KEGG pathways for DEGs.**File:** Dataset\_02\_KEGG\_DEG.xlsx (provided in Excel format)**Sheets:** L2L1, L3L1

|                |             |                       |
|----------------|-------------|-----------------------|
| <b>Fields:</b> | KEGG ID     | KEGG ID               |
|                | Pathway     | Enriched KEGG pathway |
|                | Gene ID     | Entrez Gene ID        |
|                | Log2 FC     | Log2 fold change      |
|                | Gene symbol | Gene symbol           |
|                | Gene name   | Gene name             |

**Supplementary Table 26.** List of CpGs with q-value < 0.01 for L2:L1.**File:** Dataset\_03\_CpG\_L2L1.xlsx (provided in Excel format)**Sheet:** L1L2

|                |             |                                      |
|----------------|-------------|--------------------------------------|
| <b>Fields:</b> | Chromosome  | Salmon chromosome name               |
|                | Start       | 1-base start                         |
|                | End         | 1-base end                           |
|                | Strand      | +/-                                  |
|                | Salmobase   | Link to Salmobase genome browser     |
|                | Region      | Intron, Exon, P250, P1K, P6K, Flanks |
|                | Q value     | Logistic regression and SLIM, < 0.01 |
|                | Mdiff       | Methylation difference               |
|                | abs(Mdiff)  | Absolute methylation difference      |
|                | Gene ID     | Entrez Gene ID                       |
|                | Gene symbol | Gene symbol                          |
|                | Gene name   | Gene name                            |
|                | RefSeq id   | RefSeq ID                            |

**Supplementary Table 27.** List of CpGs with q-value < 0.01 for L3:L1.**File:** Dataset\_04\_CpG\_L3L1.xlsx (provided in Excel format)**Sheet:** L3L1

|                |             |                                      |
|----------------|-------------|--------------------------------------|
| <b>Fields:</b> | Chromosome  | Salmon chromosome name               |
|                | Start       | 1-base start                         |
|                | End         | 1-base end                           |
|                | Strand      | +/-                                  |
|                | Salmobase   | Link to Salmobase genome browser     |
|                | Region      | Intron, Exon, P250, P1K, P6K, Flanks |
|                | Q value     | Logistic regression and SLIM, < 0.01 |
|                | Mdiff       | Methylation difference               |
|                | abs(Mdiff)  | Absolute4 methylation difference     |
|                | Gene ID     | Entrez Gene ID                       |
|                | Gene symbol | Gene symbol                          |
|                | Gene name   | Gene name                            |
|                | RefSeq id   | RefSeq ID                            |

**Supplementary Table 28.** List of DMGs for L2:L1 and L3:L1.**File:** Dataset\_05\_DMG.xlsx (provided in Excel format)**Sheets:** L2L1, L3L1

|                |                  |                                       |
|----------------|------------------|---------------------------------------|
| <b>Fields:</b> | Gene ID          | Entrez Gene ID                        |
|                | Total            | Total count of DMCs                   |
|                | GB               | Total count of DMCs in gene body      |
|                | Exon             | Count of DMCs in exon                 |
|                | Intron           | Count of DMCs in intron               |
|                | P                | Total count of DMCs in promoter       |
|                | P250             | Count of DMCs in promoter (1 - 250)   |
|                | P1K              | Count of DMCs in promoter (251 - 1K)  |
|                | P6K              | Count of DMCs in Promoter (1001 - 5K) |
|                | Gene symbol      | Gene name                             |
|                | Gene description | Description of gene                   |
|                | RefSeq IDs       | RefSeq IDs linked to the gene ID      |

**Supplementary Table 29.** List of enriched KEGG pathways with DMCs for L2:L1.

**File:** Dataset\_06\_KEGG\_DMG\_L2L1.xlsx (provided in Excel format)

**Sheet:** Enriched pathway

**Fields:**

|                  |                                                                              |
|------------------|------------------------------------------------------------------------------|
| Name             | KEGG pathway                                                                 |
| ID               | KEGG ID                                                                      |
| KEGG site        | Link for KEGG pathway page                                                   |
| ORA (gene ratio) | Regions where enrichment is identified by over-representation analysis       |
| Wilcox           | Regions where enrichment is identified by Wilcoxon signed-rank test          |
| KS boot          | Regions where enrichment is identified by Kolmogorov-Smirnov + bootstrapping |

**Sheets:** sasa04514, sasa03018, sasa00531, sasa04137, sasa04371, sasa00500

**Fields:**

|             |                                           |
|-------------|-------------------------------------------|
| Chromosome  | Salmon chromosome name                    |
| Start       | 1-base start                              |
| End         | 1-base end                                |
| Strand      | +/-                                       |
| Salmobase   | Link to Salmobase genome browser          |
| Region      | Intron, Exon, P250, P1K, P6K, Flanks      |
| Q value     | Logistic regression and SLIM, < 0.01      |
| Mdiff       | Methylation difference                    |
| abs(Mdiff)  | Absolute4 methylation difference (>= 20%) |
| Gene ID     | Entrez Gene ID                            |
| Gene symbol | Gene symbol                               |
| Gene name   | Gene name                                 |
| RefSeq id   | RefSeq ID                                 |

**Supplementary Table 30.** List of enriched KEGG pathways with DMCs for L3:L1.

**File:** Dataset\_07\_KEGG\_DMG\_L3L1.xlsx (provided in Excel format)

**Sheet:** Enriched pathway

**Fields:**

|                  |                                                                              |
|------------------|------------------------------------------------------------------------------|
| Name             | KEGG pathway                                                                 |
| ID               | KEGG ID                                                                      |
| KEGG site        | Link for KEGG pathway page                                                   |
| ORA (gene ratio) | Regions where enrichment is identified by over-representation analysis       |
| Wilcox           | Regions where enrichment is identified by Wilcoxon signed-rank test          |
| KS boot          | Regions where enrichment is identified by Kolmogorov-Smirnov + bootstrapping |

**Sheets:** sasa04514, sasa03018, sasa00531, sasa04137, sasa04371, sasa00500

**Fields:**

|             |                                           |
|-------------|-------------------------------------------|
| Chromosome  | Salmon chromosome name                    |
| Start       | 1-base start                              |
| End         | 1-base end                                |
| Strand      | +/-                                       |
| Salmobase   | Link to Salmobase genome browser          |
| Region      | Intron, Exon, P250, P1K, P6K, Flanks      |
| Q value     | Logistic regression and SLIM, < 0.01      |
| Mdiff       | Methylation difference                    |
| abs(Mdiff)  | Absolute4 methylation difference (>= 20%) |
| Gene ID     | Entrez Gene ID                            |
| Gene symbol | Gene symbol                               |
| Gene name   | Gene name                                 |
| RefSeq id   | RefSeq ID                                 |

### Supplementary Table 31. List of common DEGs between L2:L1 and L3:L1.

**File:** Dataset\_08\_Common\_DMG.xlsx (provided in Excel format)

**Sheet:** Common DEGs

|                |                    |                                                                                                                 |
|----------------|--------------------|-----------------------------------------------------------------------------------------------------------------|
| <b>Fields:</b> | Gene ID            | Entrez Gene ID                                                                                                  |
|                | Symbol             | Gene symbol                                                                                                     |
|                | Gene name          | Gene name                                                                                                       |
|                | Region             | Intron, Exon, P250, P1K, P6K, Flanks                                                                            |
|                | # DMCs             | Number of DMCs                                                                                                  |
|                | L2:L1 (hypo/hyper) | Number of hypo and hyper DMCs for L2:L1                                                                         |
|                | L3:L1 (hypo/hyper) | Number of hypo and hyper DMCs for L3:L1                                                                         |
|                | Matched            | Yes: The counts of hypo and hyper DMCs are equivalent between L2:L1 and L3:L1.<br>No: the counts are different. |

### Supplementary Table 32. List of DEGs with DMCs.

**File:** Dataset\_09\_DEG\_DMC.xlsx (provided in Excel format)

**Sheets:** L2L1, L3L1, L2L1 (no mdiff filter), L3L1 (no mdiff filter), L2L1 (promoters), L3L1 (promoters)

|                |             |                                      |
|----------------|-------------|--------------------------------------|
| <b>Fields:</b> | Gene ID     | Entrez Gene ID                       |
|                | Gene symbol | Gene symbol                          |
|                | Gene name   | Gene name                            |
|                | Log2 FC     | Output of DESeq2                     |
|                | Adj p-value | Output of DESeq2                     |
|                | Region      | Intron, Exon, P250, P1K, P6K, Flanks |
|                | Mdiff       | Methylation difference               |
|                | Q value     | Logistic regression and SLIM, < 0.01 |



## Supplementary figures

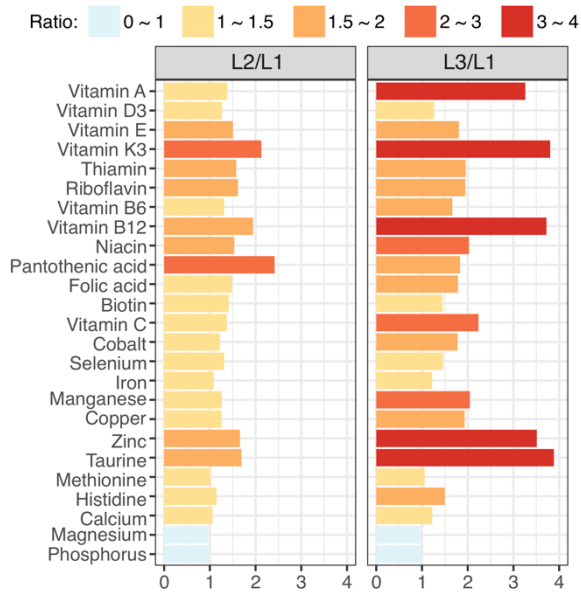

**Supplementary Figure 1.** Observed versus expected ratios of micronutrient concentrations for L2 and L3 based on L1.

The bar plot shows the ratios of L2 and L3 against L1 that were calculated with the analysed concentrations of selected vitamins, amino acids (taurine, methionine and histidine), and minerals (calcium, magnesium and phosphorous). The colours of the bars represent five different ranges of the ratio for L2/L1 and L3/L1.

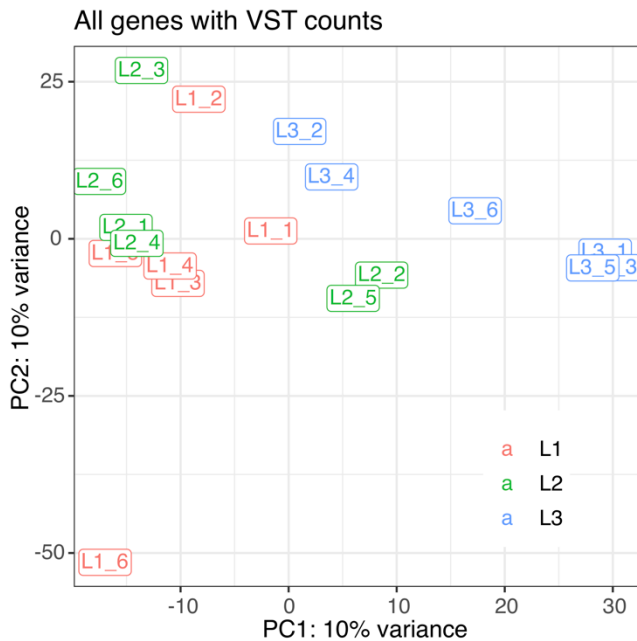

**Supplementary Figure 2.** Clustering of RNA-seq counts with all genes.

The PCA bi-plot shows all genes of RNA-seq counts with variance stabilization transformation. Samples are grouped with three different colours for L1 (red), L2 (green) and L3 (blue) diets.

STERIOD BIOSYNTHESIS

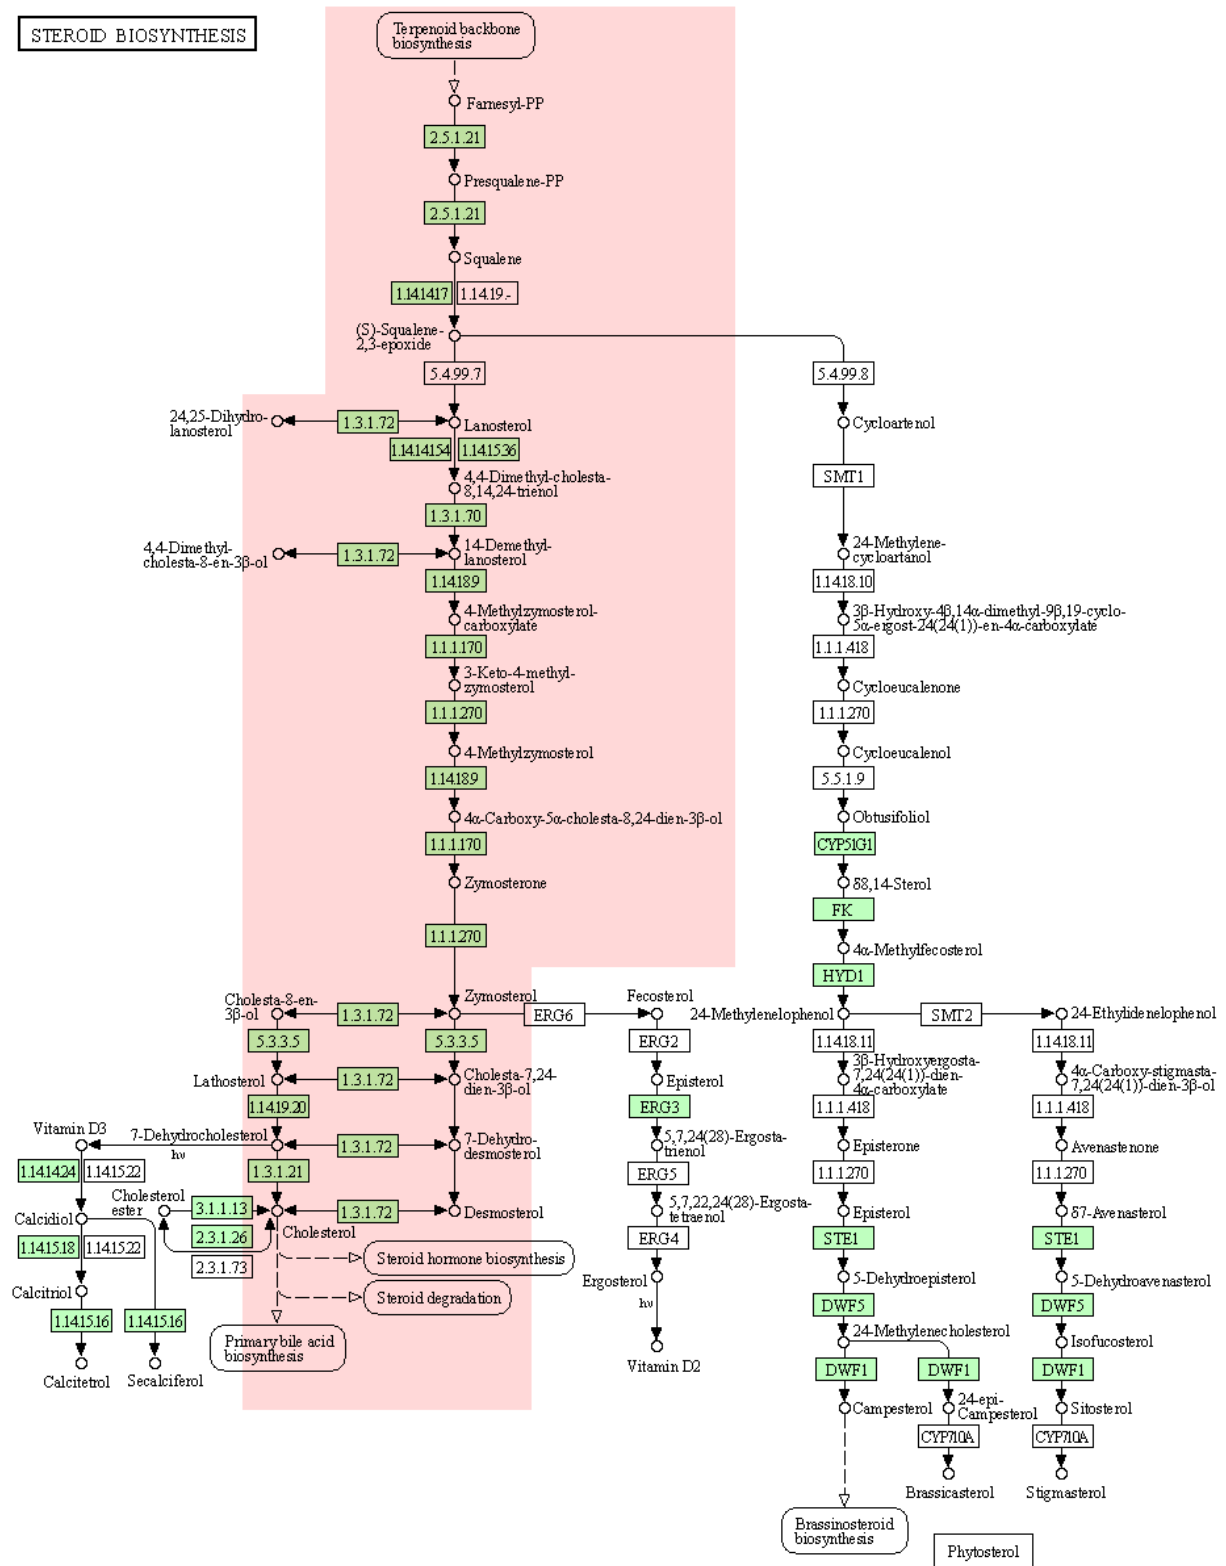

**Supplementary Figure 3.** Steroid biosynthesis pathway from KEGG. The pathway diagram shows the KEGG steroid biosynthesis pathway (sasa00100) with a total of 59 genes. The part of the pathway highlighted by light red is used in the main text.

### Terpenoid backbone biosynthesis (sasa00900)

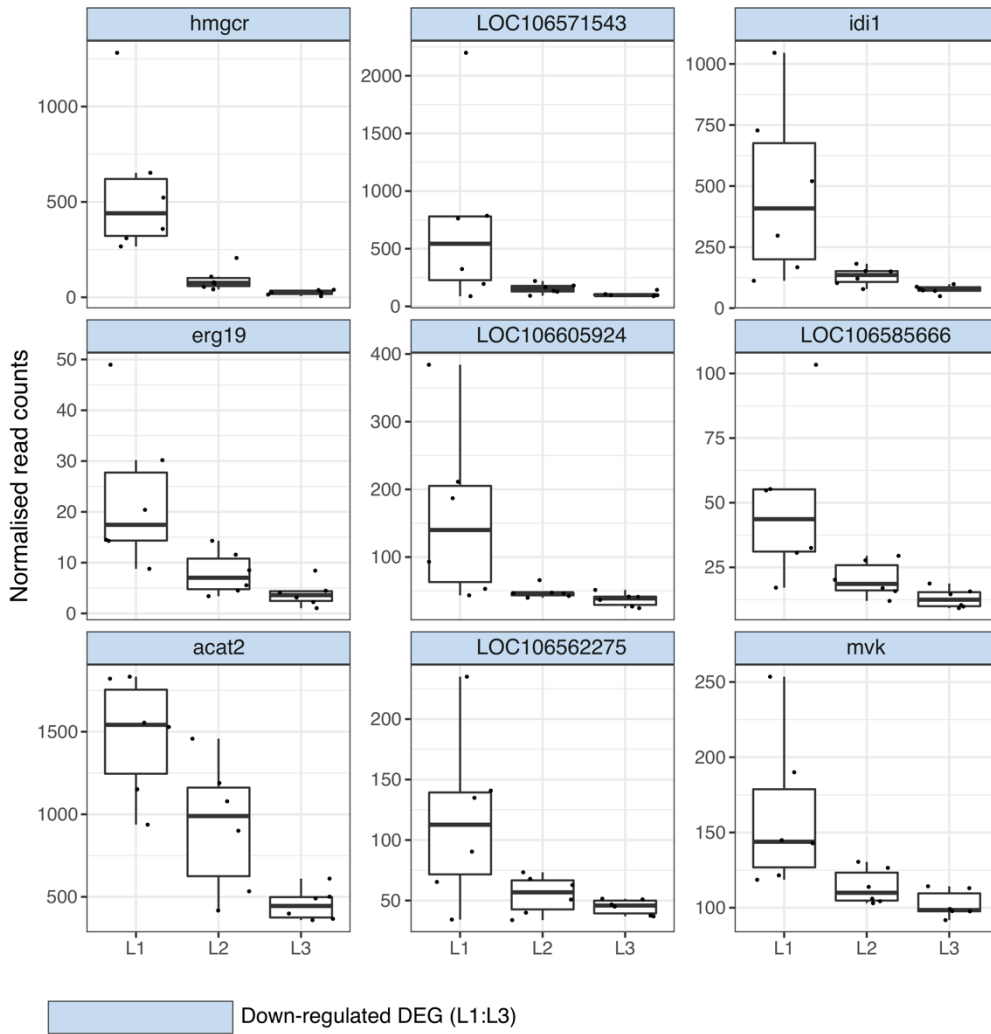

### Supplementary Figure 4. Normalised read counts of terpenoid backbone biosynthesis.

Box plots show the normalised read counts of the nine down-regulated DEGs in L3:L1 that were associated with the terpenoid backbone biosynthesis pathway. The counts were normalised with the median ratio method provided by the DESeq2 package.

### Fatty acid metabolism (sasa01212)

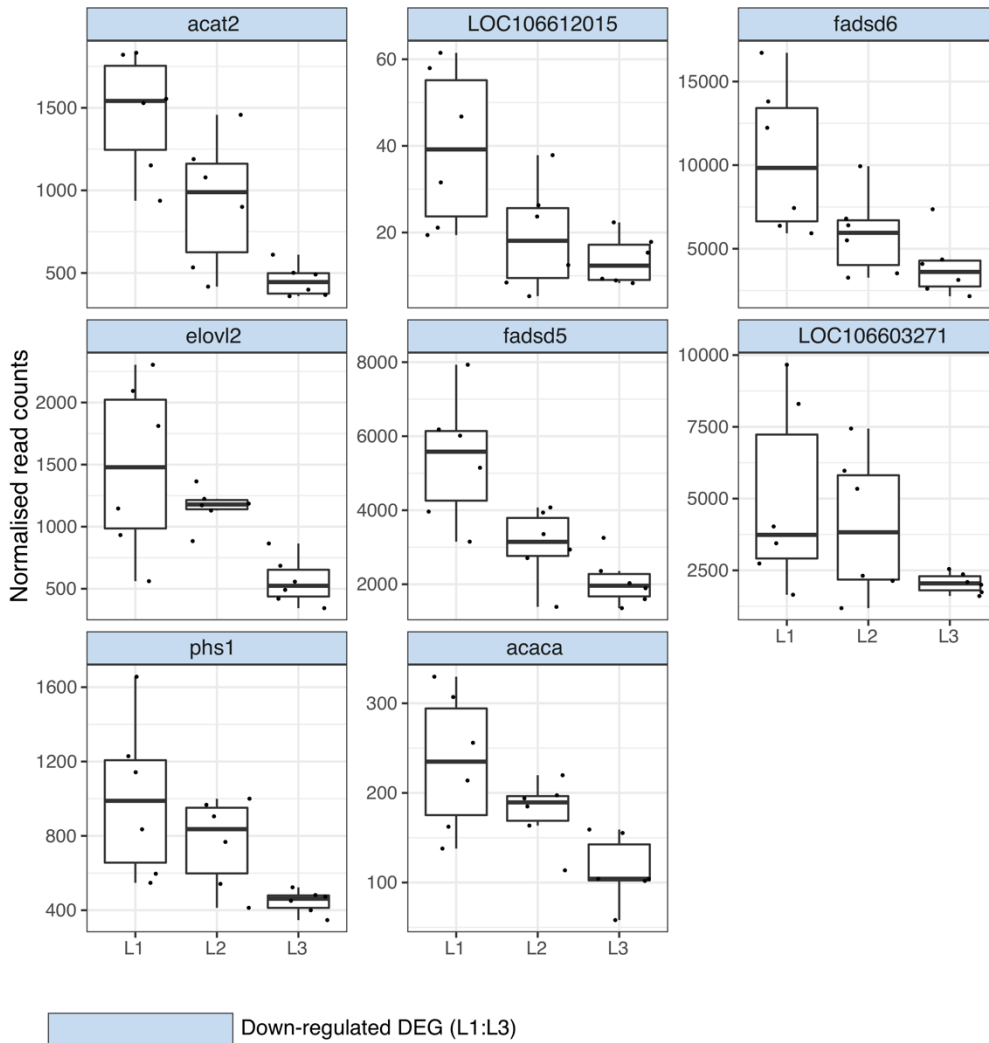

### Supplementary Figure 5. Normalised read counts of fatty acid metabolism.

Box plots show the normalised read counts of the eight down-regulated DEGs in L3:L1 that were associated with the fatty acid metabolism pathway. The counts were normalised with the median ratio method provided by the DESeq2 package.

### Carbon metabolism (sasa01200)

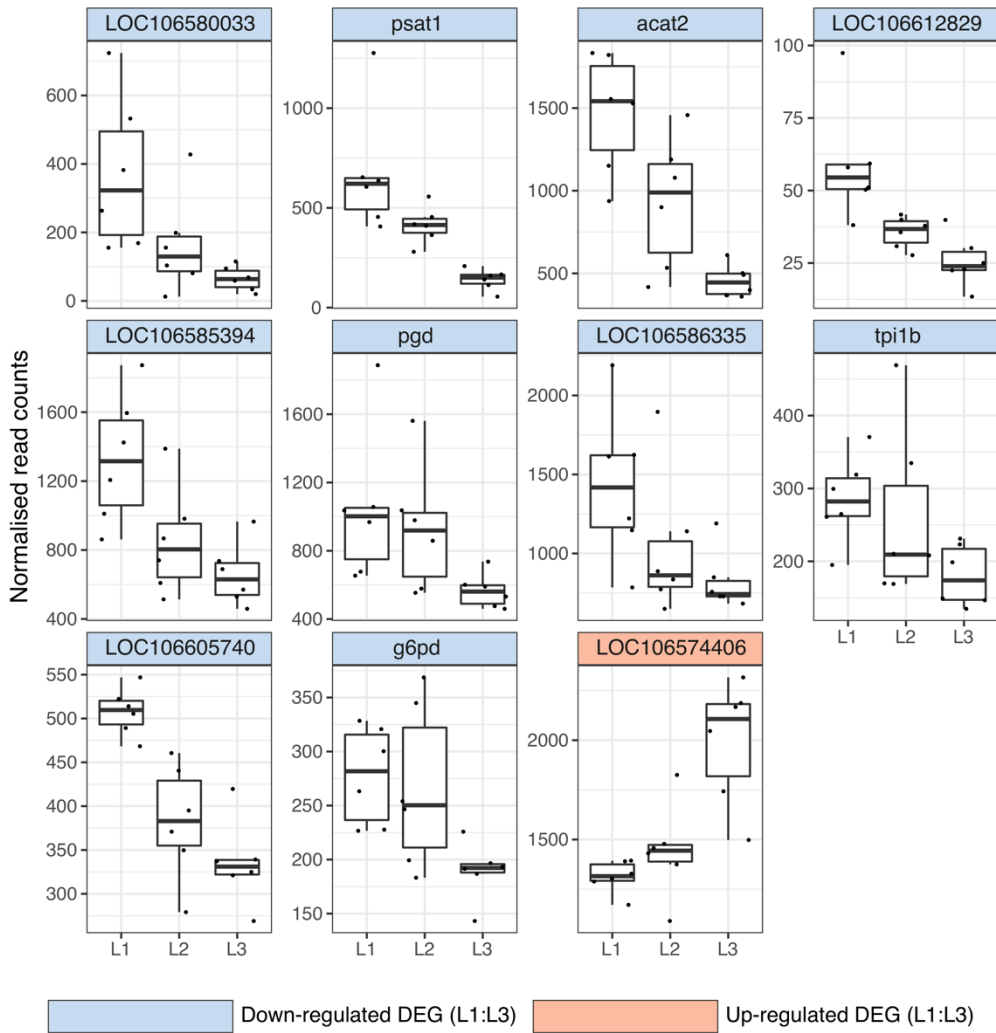

### Supplementary Figure 6. Normalised read counts of carbon metabolism.

Box plots show the normalised read counts of 10 down-regulated and one up-regulated DEGs in L3:L1 that were associated with the fatty acid metabolism pathway. The counts were normalised with the median ratio method provided by the DESeq2 package.

PPAR signaling pathway (sasa03320)

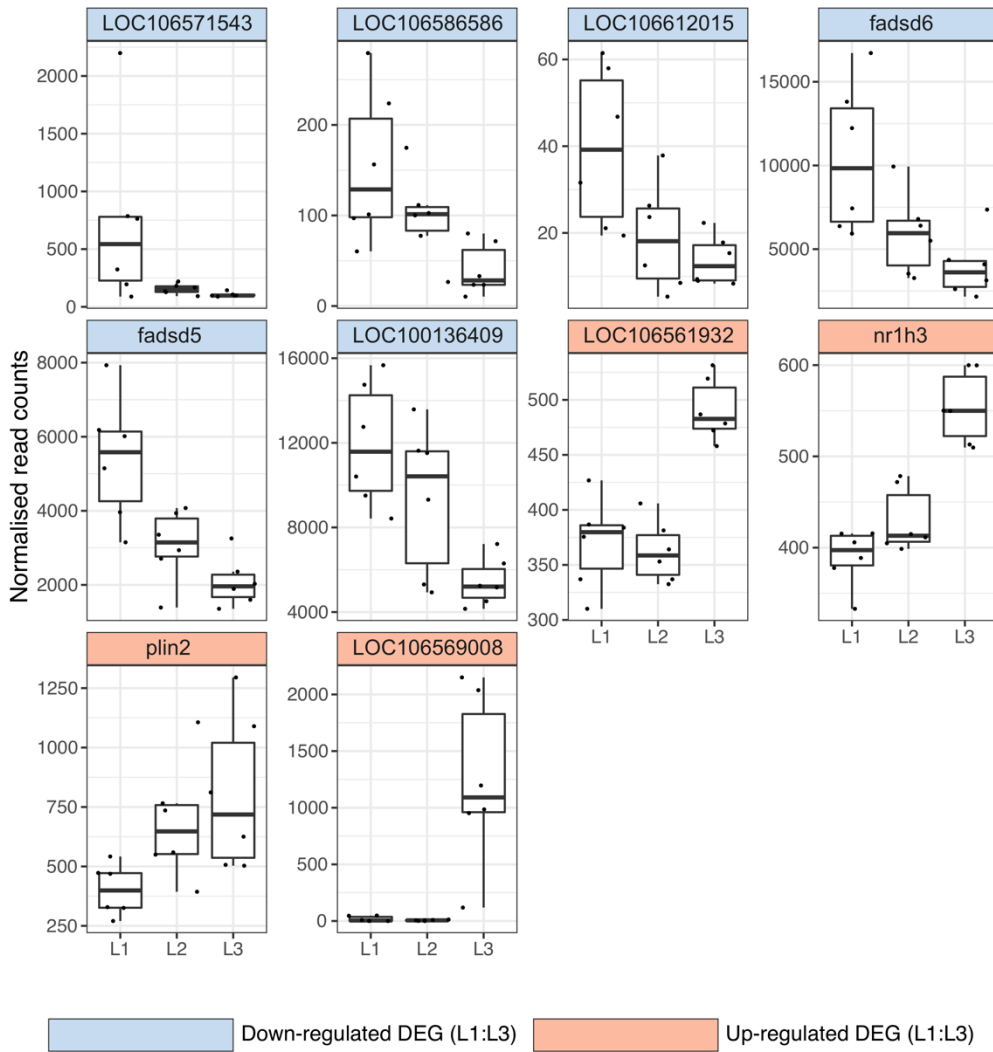

**Supplementary Figure 7.** Normalised read counts of PPAR signaling pathway.

Box plots show the normalised read counts of six down-regulated and four up-regulated DEGs in L3:L1 that were associated with the PPAR signaling pathway. The counts were normalised with the median ratio method provided by the DESeq2 package.

Pyruvate metabolism (sasa00620)

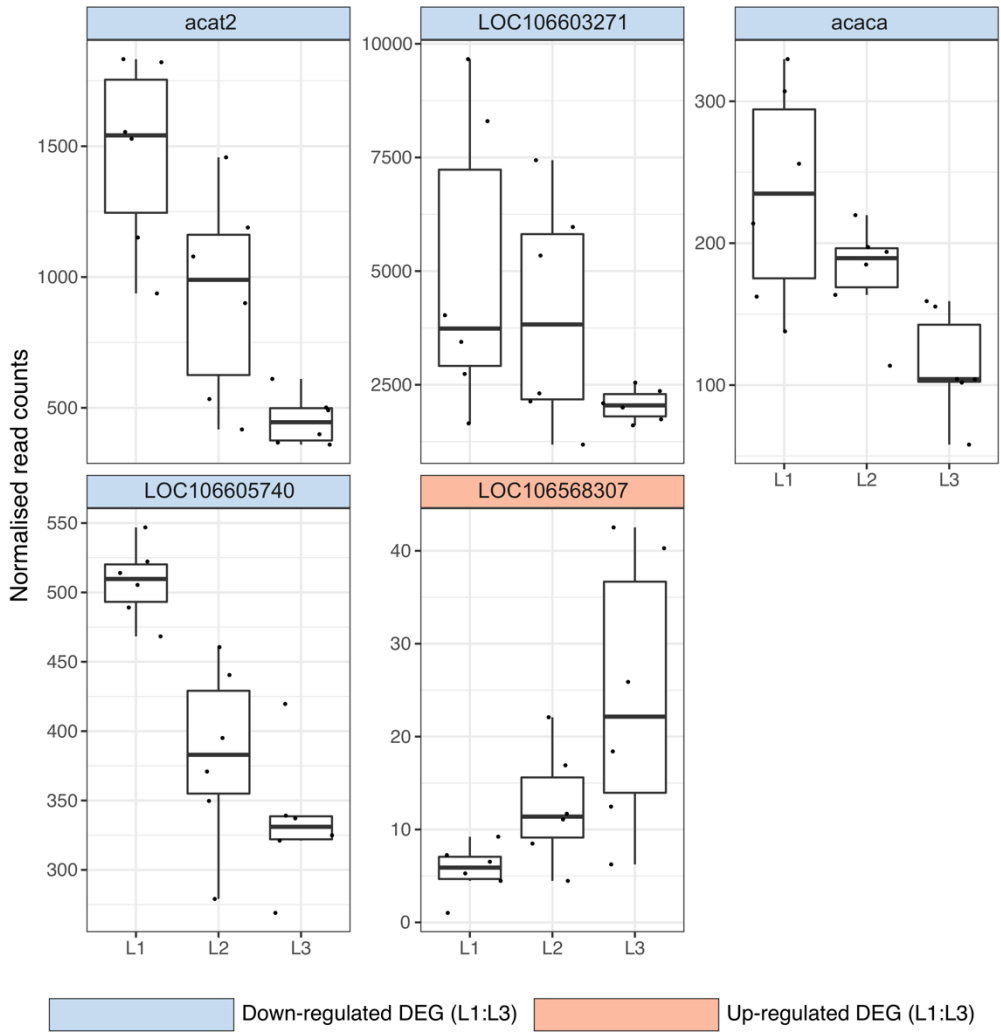

**Supplementary Figure 8.** Normalised read counts of pyruvate metabolism.

Box plots show the normalised read counts of four down-regulated and one up-regulated DEGs in L3:L1 that were associated with the pyruvate metabolism pathway. The counts were normalised with the median ratio method provided by the DESeq2 package.

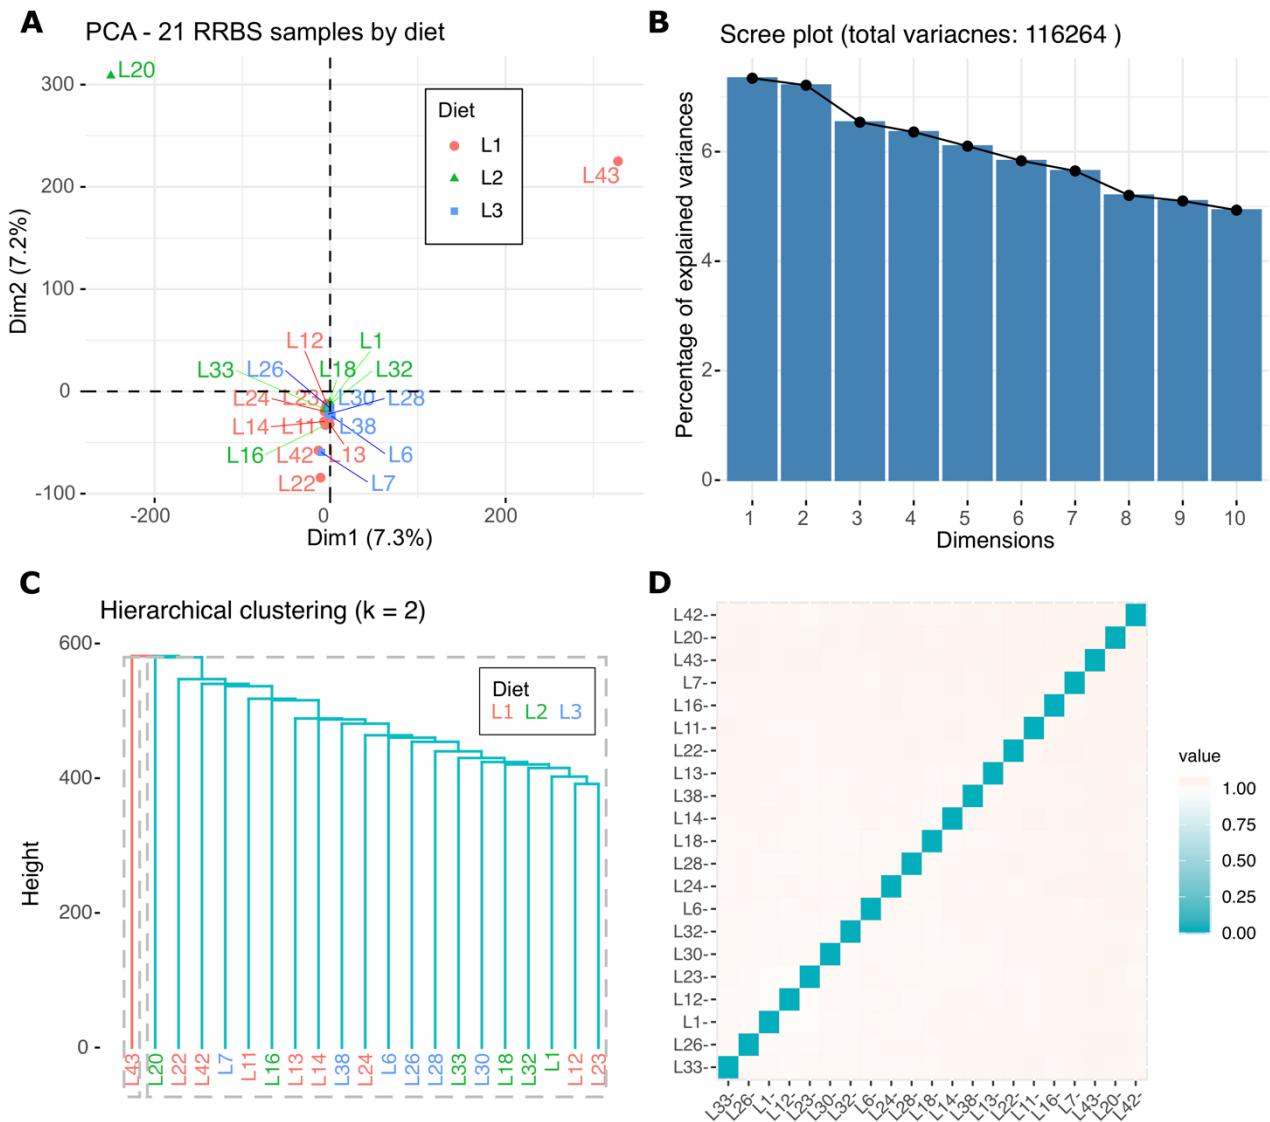

**Supplementary Figure 9.** Clustering 21 RRBS samples by three different algorithms.

(A) Biplot of principal component analysis (PCA) shows clustering of 21 samples with L1 (red), L2 (green) and L3 (blue). The percentages of explained variances for the 1<sup>st</sup> and 2<sup>nd</sup> dimensions are added to the axis title. (B) Scree plots shows the percentages of explained variances for the top 10 dimensions of the PCA. (C) Hierarchical clustering shows a dendrogram with two clusters (k = 2). The optimal number of clusters (k) was estimated by the gap statistics. (D) Heatmap shows sample-sample distances in a grid. The distance value,  $d$ , was calculated as normalized Pearson's correlation coefficient in a range between 0 and 1, with  $d = 0$  as  $r = 1$  and  $d = 1$  as  $r = -1$ .



**A** t-SNE: 21 RRBS samples

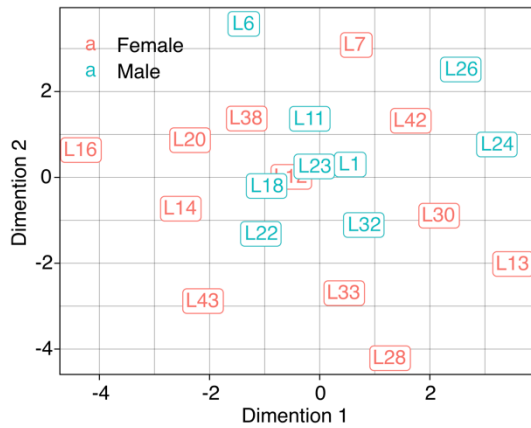

**B** PCA: 21 RRBS samples

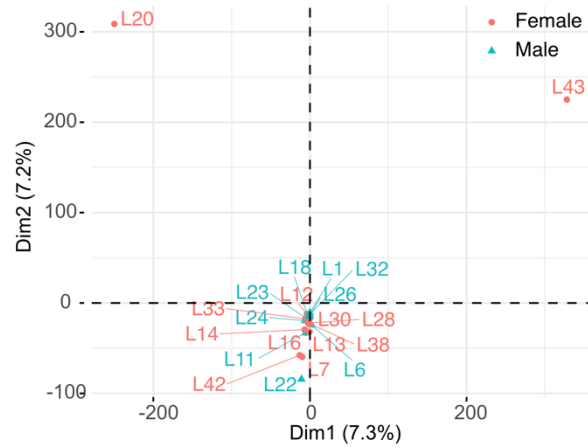

**Supplementary Figure 10.** Clustering 21 RRBS samples by sex.

(A) The t-SNE plot shows clustering of 21 RRBS samples with female (red) and male (blue). The perplexity used was 2. (B) Biplot of principal component analysis (PCA) shows clustering of 21 samples with female (red) and male (blue). The percentages of explained variances for the 1<sup>st</sup> and 2<sup>nd</sup> dimensions are added to the axis title.

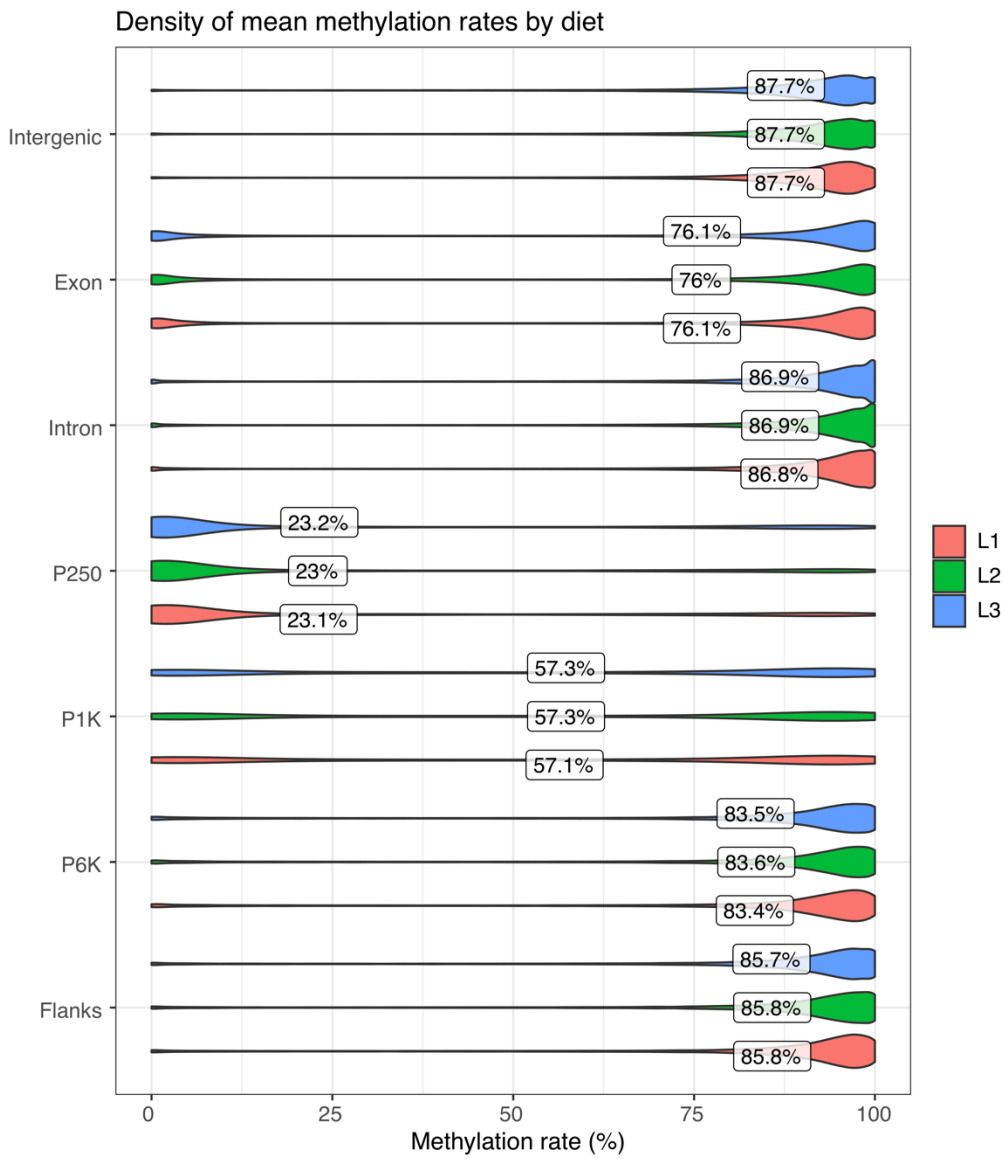

**Supplementary Figure 11.** Regional methylation rates by diet.

The violin plots show the densities of methylation regions in seven different regions (intergenic, exon, intron, P250, P1K, P6K, and flanks) by diet.

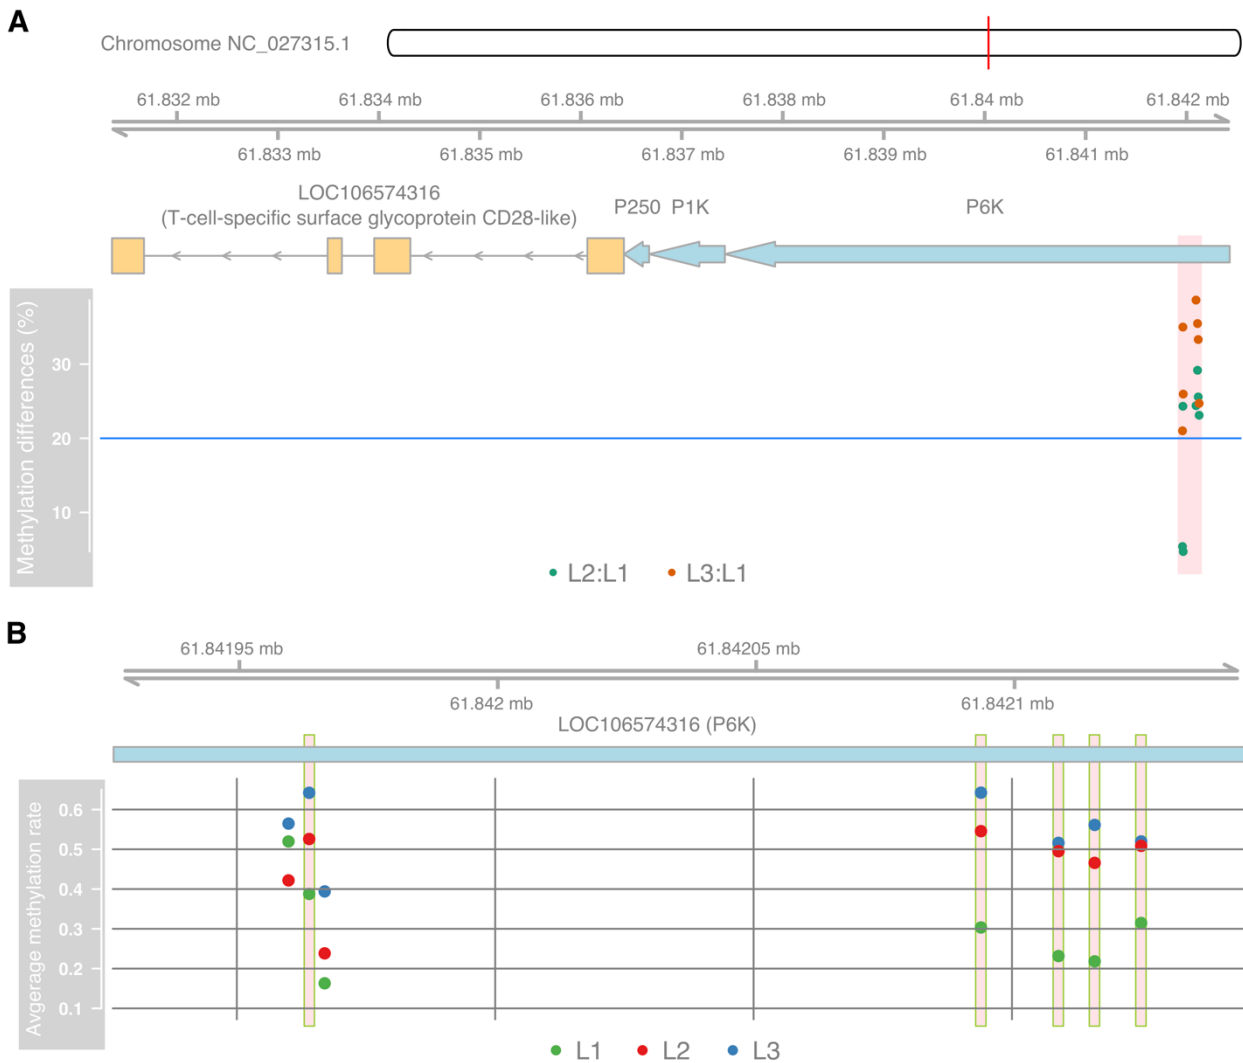

**Supplementary Figure 12.** Genomic feature view of the *CD28* (*LOC106574316*).

Visualization of genomic data of the *CD28* (*T-cell-specific surface glycoprotein CD28-like*, *LOC106574316*) locus and its vicinity provides information about DNA methylation features: methylation differences and methylation rates. (A) The main track at the bottom shows differences of methylation rates for L2:L1 and L3:L1. The blue line indicates a threshold 20%. (B) An enlarged view shows the part of the genomic region that is indicated as red highlighted rectangle in (A). The main track at the bottom shows methylation rates of L1, L2, and L3. Five common DMCs between L2:L1 and L3:L1 are highlighted with vertical bars.

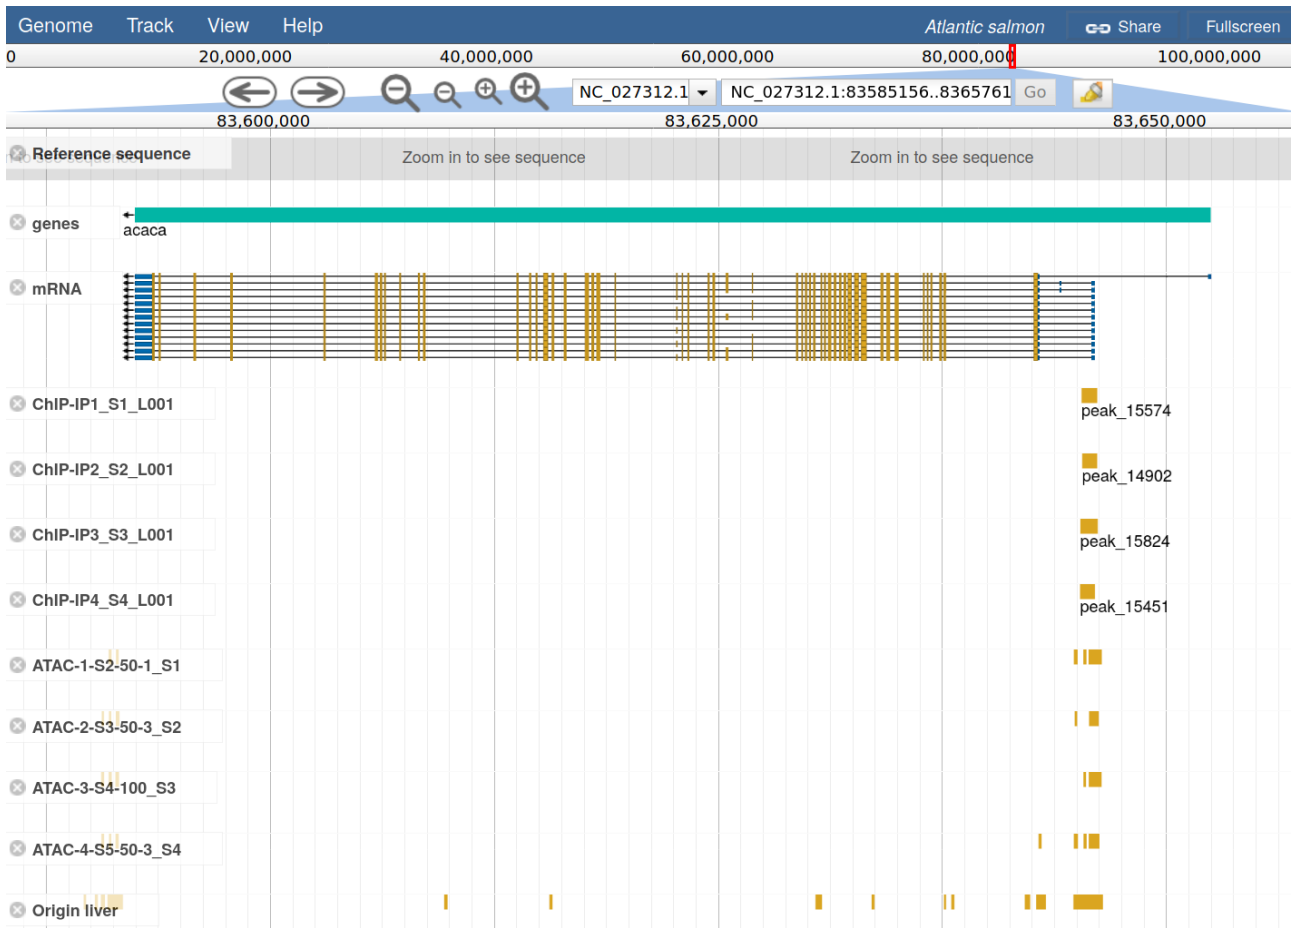

**Supplementary Figure 13.** Screenshot of the genomic region around *acaca* in SalmoBase. The screenshot of genome browser in SalmoBase shows a genomic region around the *acaca* gene with its isoforms, four ChiP IP peaks, four general ATAC peaks, and one liver specific ATATC peaks.

## References

1. Vera LM, *et al.* Higher dietary micronutrients are required to maintain optimal performance of Atlantic salmon (*Salmo salar*) fed a high plant material diet during the full production cycle. *Aquaculture* **528**, 735551 (2020).
2. Council NR. *Nutrient requirements of fish and shrimp*. National academies press (2011).
3. Hamre K, *et al.* Antioxidant nutrition in Atlantic salmon (*Salmo salar*) parr and post-smolt, fed diets with high inclusion of plant ingredients and graded levels of micronutrients and selected amino acids. *Peerj* **4**, (2016).
4. Hemre GI, *et al.* Atlantic salmon (*Salmo salar*) require increased dietary levels of B-vitamins when fed diets with high inclusion of plant based ingredients. *Peerj* **4**, (2016).
5. Feldsine P, Abeyta C, Andrews WH, Committee AIM. AOAC International methods committee guidelines for validation of qualitative and quantitative food microbiological official methods of analysis. *J AOAC Int* **85**, 1187-1200 (2002).
6. Maeland A, Ronnestad I, Fyhn HJ, Berg L, Waagbo R. Water-soluble vitamins in natural plankton (copepods) during two consecutive spring blooms compared to vitamins in *Artemia franciscana* nauplii and metanauplii. *Mar Biol* **136**, 765-772 (2000).
7. Bronstad I, Bjerkas I, Waagbo R. The need for riboflavin supplementation in high and low energy diets for Atlantic salmon *Salmo salar* L. parr. *Aquaculture Nutrition* **8**, 209-220 (2002).
8. Maeland A, Waagbo R. Examination of the qualitative ability of some cold water marine teleosts to synthesise ascorbic acid. *Comp Biochem Phys A* **121**, 249-255 (1998).
9. Moren M, Opstad I, Berntssen MHG, Infante JLZ, Hamre K. An optimum level of vitamin A supplements for Atlantic halibut (*Hippoglossus hippoglossus* L.) juveniles. *Aquaculture* **235**, 587-599 (2004).
